# Supplementary material for: Fissisternoids A and B, two 2′,5′-quinodihydrochalcone-based meroterpenoid enantiomers with unusual carbon skeletons from Fissistigma bracteolatum
Source: Royal Society of Chemistry journal article supplement (doi:10.1039/d1qo01404h), 2021-11-19
Supplement: d1qo01404h1.pdf [file d1qo01404h1.pdf]

## Supplementary Information

### **Fissisternoids A and B, two Pairs of 2',5'- Quinodihydrochalcone-Based Meroterpenoid Enantiomers with Unusual Carbon Skeletons from *Fissistigma bracteolatum***

Gui-Min Xue\*, Chen-Guang Zhao, Jin-Feng Xue, Hui Chen, Zhen-Zhu Zhao, Ying-Ying Si, Kun Du, Yan-Le Zhi, and Wei-Sheng Feng\*

*College of Pharmacy, Henan University of Chinese Medicine, Zhengzhou 450046,  
China*

\* *Corresponding Authors. Tel/Fax: +86-25-83271405;*

*E-mail: xueguimin123@126.com (Gui-Min Xue); fwsh@hactcm.edu.cn (Wei-Sheng Feng).*

## Contents

|                                                                                                                                                                                                                                                                                                                                                                                                                                                                                                                                                                                                  |     |
|--------------------------------------------------------------------------------------------------------------------------------------------------------------------------------------------------------------------------------------------------------------------------------------------------------------------------------------------------------------------------------------------------------------------------------------------------------------------------------------------------------------------------------------------------------------------------------------------------|-----|
| <b>X-Ray Crystallographic analysis of 1</b> .....                                                                                                                                                                                                                                                                                                                                                                                                                                                                                                                                                | S4  |
| <b>Table S1.</b> Gibbs free energies ( $\Delta G$ ) <sup>a</sup> and Boltzmann distribution (P%) <sup>b</sup> of low-energy conformers of <b>1</b> .....                                                                                                                                                                                                                                                                                                                                                                                                                                         | S7  |
| <b>Table S2.</b> Cartesian coordinates for the low-energy reoptimized MMFF conformers of <b>1</b> at B3LYP/6-31+G(d,p) level of theory in CH <sub>3</sub> OH.....                                                                                                                                                                                                                                                                                                                                                                                                                                | S7  |
| <b>Table S3.</b> Gibbs free energies ( $\Delta G$ ) <sup>a</sup> and Boltzmann distribution (P%) <sup>b</sup> of low-energy conformers of <b>2</b> .....                                                                                                                                                                                                                                                                                                                                                                                                                                         | S17 |
| <b>Table S4.</b> Cartesian coordinates for the low-energy reoptimized MMFF conformers of <b>2</b> at B3LYP/6-31+G(d,p) level of theory in CH <sub>3</sub> OH.....                                                                                                                                                                                                                                                                                                                                                                                                                                | S17 |
| <b>Table S5.</b> The NO product inhibitory effects of compounds <b>1</b> and <b>2</b> in RAW 264.7 macrophages .....                                                                                                                                                                                                                                                                                                                                                                                                                                                                             | S26 |
| <b>Figure S1.</b> The chiral HPLC resolution of <b>1</b> and <b>2</b> led to the separation of two pairs of enantiomers (–)- <b>1</b> and (+)- <b>1</b> , and (–)- <b>2</b> and (+)- <b>2</b> , respectively. The spectra were obtained by <i>Pre</i> -HPLC with a LC-120 system (Separation, Beijing, China), equipped with a Chiralpak® IC column (10 mm × 250 mm i.d., 5 μm, Daicel, Tokyo, Japan) with flow rate at 3.0 ml/min (v/v: n-hexane: isopropanol = 90:10, <b>1</b> ; cyclohexane: isopropanol = 80:20, <b>2</b> ), detected by a binary channel UV detector at 210 and 300 nm..... | S27 |
| Figure S1-1 UV spectrum of compound <b>1</b> (MeOH).....                                                                                                                                                                                                                                                                                                                                                                                                                                                                                                                                         | S27 |
| Figure S1-2 HRESIMS of compound <b>1</b> .....                                                                                                                                                                                                                                                                                                                                                                                                                                                                                                                                                   | S28 |
| Figure S1-3 IR spectrum of compound <b>1</b> (MeOH).....                                                                                                                                                                                                                                                                                                                                                                                                                                                                                                                                         | S28 |
| Figure S1-4 <sup>1</sup> H NMR spectrum of compound <b>1</b> (CDCl <sub>3</sub> , 500 MHz).....                                                                                                                                                                                                                                                                                                                                                                                                                                                                                                  | S29 |
| Figure S1-5 <sup>13</sup> C NMR spectrum of compound <b>1</b> (CDCl <sub>3</sub> , 125 MHz).....                                                                                                                                                                                                                                                                                                                                                                                                                                                                                                 | S29 |
| Figure S1-6 <sup>1</sup> H- <sup>1</sup> H COSY spectrum of compound <b>1</b> .....                                                                                                                                                                                                                                                                                                                                                                                                                                                                                                              | S30 |
| Figure S1-7 HSQC spectrum of compound <b>1</b> (CDCl <sub>3</sub> , 500 MHz).....                                                                                                                                                                                                                                                                                                                                                                                                                                                                                                                | S30 |
| Figure S1-8 HMBC spectrum of compound <b>1</b> (CDCl <sub>3</sub> , 500 MHz).....                                                                                                                                                                                                                                                                                                                                                                                                                                                                                                                | S31 |
| Figure S1-8-1 The expansion HMBC spectrum of compound <b>1</b> (CDCl <sub>3</sub> , 500 MHz).....                                                                                                                                                                                                                                                                                                                                                                                                                                                                                                | S31 |
| Figure S1-8-2 The expansion HMBC spectrum of compound <b>1</b> (CDCl <sub>3</sub> , 500 MHz).....                                                                                                                                                                                                                                                                                                                                                                                                                                                                                                | S32 |

|                                                                                                   |     |
|---------------------------------------------------------------------------------------------------|-----|
| Figure S1-8-3 The expansion HMBC spectrum of compound <b>1</b> (CDCl <sub>3</sub> , 500 MHz)..... | S32 |
| Figure S1-8-4 The expansion HMBC spectrum of compound <b>1</b> (CDCl <sub>3</sub> , 500 MHz)..... | S33 |
| Figure S1-9 ROESY spectrum of compound <b>1</b> (CDCl <sub>3</sub> ).....                         | S33 |
| Figure S2-1 UV spectrum of compound <b>2</b> (MeOH).....                                          | S34 |
| Figure S2-2 HRESIMS of compound <b>2</b> .....                                                    | S34 |
| Figure S2-3 IR spectrum of compound <b>2</b> (MeOH).....                                          | S35 |
| Figure S2-4 <sup>1</sup> H NMR spectrum of compound <b>2</b> (CDCl <sub>3</sub> , 500 MHz).....   | S35 |
| Figure S2-5 <sup>13</sup> C NMR spectrum of compound <b>2</b> (CDCl <sub>3</sub> , 125 MHz).....  | S36 |
| Figure S2-6 <sup>1</sup> H- <sup>1</sup> H COSY spectrum of compound <b>2</b> .....               | S36 |
| Figure S2-7 HSQC spectrum of compound <b>2</b> (CDCl <sub>3</sub> ).....                          | S37 |
| Figure S2-8 HMBC spectrum of compound <b>2</b> (CDCl <sub>3</sub> ).....                          | S37 |
| Figure S2-8-1 The expansion HMBC spectrum of compound <b>2</b> (CDCl <sub>3</sub> , 500 MHz)..... | S38 |
| Figure S2-8-2 The expansion HMBC spectrum of compound <b>2</b> (CDCl <sub>3</sub> , 500 MHz)..... | S38 |
| Figure S2-8-3 The expansion HMBC spectrum of compound <b>2</b> (CDCl <sub>3</sub> , 500 MHz)..... | S39 |
| Figure S2-8-4 The expansion HMBC spectrum of compound <b>2</b> (CDCl <sub>3</sub> , 500 MHz)..... | S39 |
| Figure S2-9 ROESY spectrum of compound <b>2</b> (CDCl <sub>3</sub> ).....                         | S40 |
| Figure S3-1 <sup>1</sup> H NMR spectrum of compound <b>3</b> (CDCl <sub>3</sub> , 500 MHz).....   | S40 |
| Figure S3-2 <sup>13</sup> C NMR spectrum of compound <b>3</b> (CDCl <sub>3</sub> , 125 MHz).....  | S41 |

## X-Ray Crystallographic analysis of 1.

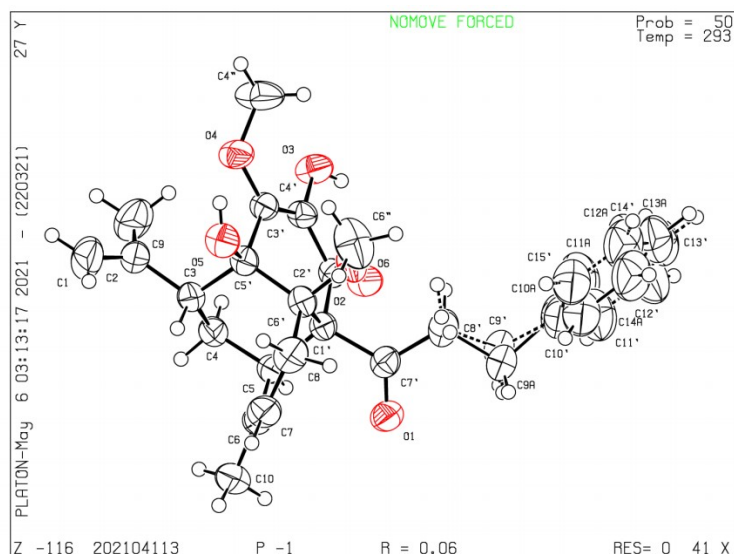

Crystal data of **1**:  $C_{27}H_{32}O_6$ ,  $M = 452.53$ ,  $a = 8.6532(5)$  Å,  $b = 9.9783(5)$  Å,  $c = 14.750(7)$  Å,  $\alpha = 100.835(4)^\circ$ ,  $\beta = 102.254(4)^\circ$ ,  $\gamma = 95.682(4)^\circ$ , Volume =  $1205.81(11)$  Å<sup>3</sup>,  $T = 293$ , space group  $P-1$ ,  $Z = 2$ ,  $\mu$  (MuK $\alpha$ ) =  $0.709$  mm<sup>-1</sup>, 3456 reflections measured, 4294 independent reflections ( $R_{int} = 0.0247$ ). Final R indexes [all data]  $R_1 = 0.0588$ ,  $wR_2 = 0.1722$ . Crystallographic data for **1** have been deposited with the Cambridge Crystallographic Data Centre as supplementary publication no. CCDC 2107685.

### X-ray crystallographic data of 1

Bond precision: C-C = 0.0033 Å Wavelength=1.54184

Cell:  $a = 8.6532(5)$   $b = 9.9783(5)$   $c = 14.7050(7)$

$\alpha = 100.835(4)$   $\beta = 102.254(4)$   $\gamma = 95.682(4)$

Temperature: 293 K

|                        | Calculated          | Reported            |
|------------------------|---------------------|---------------------|
| Volume                 | 1205.81(11)         | 1205.82(11)         |
| Space group            | P -1                | P -1                |
| Hall group             | -P 1                | -P 1                |
| Moiety formula         | $C_{27} H_{32} O_6$ | $C_{27} H_{32} O_6$ |
| Sum formula            | $C_{27} H_{32} O_6$ | $C_{27} H_{32} O_6$ |
| Mr                     | 452.53              | 452.52              |
| Dx, g cm <sup>-3</sup> | 1.246               | 1.246               |

|                                                                                            |                                 |              |
|--------------------------------------------------------------------------------------------|---------------------------------|--------------|
| Z                                                                                          | 2                               | 2            |
| Mu (mm <sup>-1</sup> )                                                                     | 0.709                           | 0.709        |
| F000                                                                                       | 484.0                           | 484.0        |
| F000'                                                                                      | 485.51                          |              |
| h, k, l <sub>max</sub>                                                                     | 10,11,17                        | 10,11,17     |
| Nref                                                                                       | 4299                            | 4294         |
| T <sub>min</sub> , T <sub>max</sub>                                                        | 0.918, 0.945                    | 0.867, 1.000 |
| T <sub>min</sub> '                                                                         | 0.899                           |              |
| Correction method = # Reported T Limits: T <sub>min</sub> = 0.867 T <sub>max</sub> = 1.000 |                                 |              |
| AbsCorr = MULTI-SCAN                                                                       |                                 |              |
| Data completeness = 0.999                                                                  | Theta(max) = 67.073             |              |
| R(reflections)= 0.0588 (3456)                                                              | wR2(reflections)= 0.1722( 4294) |              |
| S = 1.065                                                                                  | Npar= 302                       |              |

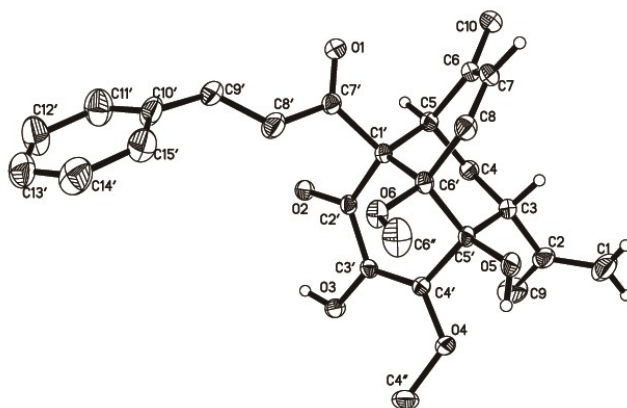

View of a molecule of **1** with the atom-labelling scheme (Displacement ellipsoids are drawn at the 30% probability level).



**Table S1.** Gibbs free energies ( $\Delta G$ )<sup>a</sup> and Boltzmann distribution (P%)<sup>b</sup> of low-energy conformers of **1**.

| Conformers | In MeOH    |          |
|------------|------------|----------|
|            | $\Delta G$ | P(%)/100 |
| <b>1-1</b> | 0.00       | 0.418    |
| <b>1-2</b> | 1.36       | 0.242    |
| <b>1-3</b> | 2.71       | 0.140    |
| <b>1-4</b> | 3.68       | 0.094    |
| <b>1-5</b> | 4.94       | 0.057    |
| <b>1-6</b> | 7.61       | 0.019    |

<sup>a</sup> B3LYP/6-31g, in kcal/mol. <sup>b</sup> From  $\Delta G$  values at 298.15 K.

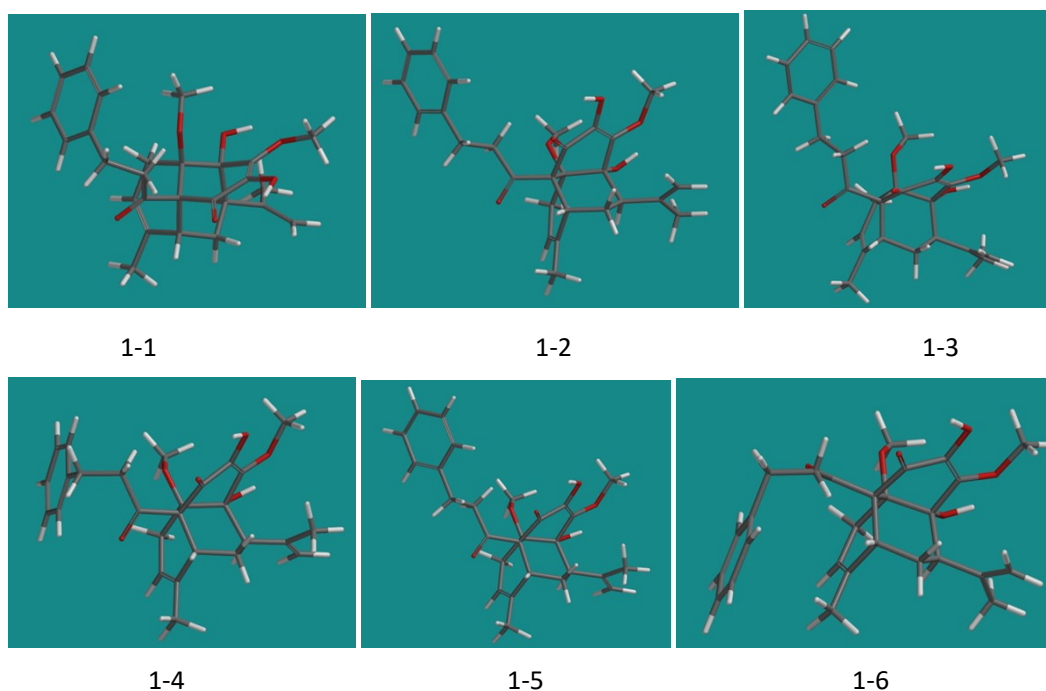

**Table S2.** Cartesian coordinates for the low-energy reoptimized MMFF conformers of **1** at B3LYP/6-31+G(d,p) level of theory in CH<sub>3</sub>OH.

| Center Number | 1-1           |             | Standard Orientation (Ångstroms) |           |           |
|---------------|---------------|-------------|----------------------------------|-----------|-----------|
|               | Atomic Number | Atomic Type | X                                | Y         | Z         |
| 1             | 6             | 0           | -0.120577                        | -0.009525 | -0.502004 |
| 2             | 6             | 0           | 0.596612                         | 1.096983  | -1.309054 |
| 3             | 6             | 0           | 0.519489                         | 2.480464  | -0.720491 |
| 4             | 6             | 0           | -0.011689                        | 2.761079  | 0.472206  |
| 5             | 6             | 0           | -0.714530                        | 1.676696  | 1.271825  |
| 6             | 6             | 0           | -0.057103                        | 0.280270  | 1.035803  |
| 7             | 6             | 0           | -1.645817                        | -0.137903 | -0.880806 |
| 8             | 6             | 0           | -2.216061                        | 1.643428  | 0.900659  |
| 9             | 6             | 0           | -2.439983                        | 1.187160  | -0.551337 |
| 10            | 6             | 0           | -0.847403                        | -0.779540 | 1.806725  |

|    |   |   |           |           |           |
|----|---|---|-----------|-----------|-----------|
| 11 | 6 | 0 | -2.241665 | -1.323326 | -0.127500 |
| 12 | 6 | 0 | -1.898504 | -1.563653 | 1.161200  |
| 13 | 8 | 0 | -0.629289 | -0.995908 | 3.005292  |
| 14 | 8 | 0 | -2.449459 | -2.529010 | 1.959540  |
| 15 | 6 | 0 | 1.398272  | 0.293785  | 1.626837  |
| 16 | 8 | 0 | 1.886535  | 1.343386  | 1.998657  |
| 17 | 6 | 0 | 2.157259  | -1.017184 | 1.809204  |
| 18 | 6 | 0 | 3.689810  | -0.846733 | 1.773935  |
| 19 | 6 | 0 | 4.246138  | -0.584129 | 0.388602  |
| 20 | 6 | 0 | 4.428518  | 0.723568  | -0.084657 |
| 21 | 6 | 0 | 4.921783  | 0.957295  | -1.370316 |
| 22 | 6 | 0 | 5.243787  | -0.113203 | -2.206773 |
| 23 | 6 | 0 | 5.071461  | -1.420076 | -1.746210 |
| 24 | 6 | 0 | 4.578245  | -1.649288 | -0.460815 |
| 25 | 1 | 0 | -0.622583 | 1.902064  | 2.339407  |
| 26 | 6 | 0 | 0.017018  | 4.135186  | 1.083484  |
| 27 | 8 | 0 | -1.710515 | -0.370965 | -2.285022 |
| 28 | 6 | 0 | -3.914248 | 1.129912  | -0.950099 |
| 29 | 6 | 0 | -4.886714 | 0.737405  | -0.118348 |
| 30 | 6 | 0 | -4.232035 | 1.603090  | -2.349531 |
| 31 | 8 | 0 | 0.533718  | -1.267582 | -0.677801 |
| 32 | 6 | 0 | 0.811707  | -1.776145 | -1.979586 |
| 33 | 8 | 0 | -3.130793 | -1.992282 | -0.893349 |
| 34 | 6 | 0 | -4.020383 | -2.972995 | -0.334223 |
| 35 | 1 | 0 | 0.215947  | 1.097067  | -2.337324 |
| 36 | 1 | 0 | 1.656090  | 0.810703  | -1.375716 |
| 37 | 1 | 0 | 0.996536  | 3.269468  | -1.301070 |
| 38 | 1 | 0 | -2.647475 | 2.643400  | 1.024770  |
| 39 | 1 | 0 | -2.750854 | 0.994354  | 1.601541  |
| 40 | 1 | 0 | -1.970696 | 1.935049  | -1.199953 |
| 41 | 1 | 0 | -1.993541 | -2.393915 | 2.820256  |
| 42 | 1 | 0 | 1.856788  | -1.385587 | 2.799098  |
| 43 | 1 | 0 | 1.817559  | -1.752633 | 1.078693  |
| 44 | 1 | 0 | 3.965013  | -0.030918 | 2.449286  |
| 45 | 1 | 0 | 4.137799  | -1.764014 | 2.174916  |
| 46 | 1 | 0 | 4.175723  | 1.559608  | 0.561250  |
| 47 | 1 | 0 | 5.060859  | 1.978878  | -1.715574 |
| 48 | 1 | 0 | 5.632810  | 0.068943  | -3.205217 |
| 49 | 1 | 0 | 5.328542  | -2.261766 | -2.384698 |
| 50 | 1 | 0 | 4.456497  | -2.671030 | -0.105838 |
| 51 | 1 | 0 | 0.439567  | 4.874082  | 0.394996  |
| 52 | 1 | 0 | -0.985785 | 4.477118  | 1.374538  |
| 53 | 1 | 0 | 0.629222  | 4.124781  | 1.994784  |
| 54 | 1 | 0 | -2.441509 | -0.997340 | -2.427474 |



|    |   |   |           |           |           |
|----|---|---|-----------|-----------|-----------|
| 55 | 1 | 0 | -5.926585 | 0.727467  | -0.436198 |
| 56 | 1 | 0 | -4.696829 | 0.415946  | 0.901451  |
| 57 | 1 | 0 | -3.972758 | 2.665131  | -2.464406 |
| 58 | 1 | 0 | -3.639001 | 1.060740  | -3.093918 |
| 59 | 1 | 0 | -5.294413 | 1.486866  | -2.586746 |
| 60 | 1 | 0 | 1.214428  | -1.011703 | -2.651445 |
| 61 | 1 | 0 | 1.576244  | -2.544056 | -1.832237 |
| 62 | 1 | 0 | -0.075003 | -2.219762 | -2.440834 |
| 63 | 1 | 0 | -3.461478 | -3.801771 | 0.102015  |
| 64 | 1 | 0 | -4.658340 | -2.516109 | 0.425491  |
| 65 | 1 | 0 | -4.624668 | -3.317905 | -1.174742 |

| Center<br>Number | 1-2              |                | Standard Orientation<br>(Ångstroms) |           |           |
|------------------|------------------|----------------|-------------------------------------|-----------|-----------|
|                  | Atomic<br>Number | Atomic<br>Type | X                                   | Y         | Z         |
| 1                | 6                | 0              | 0.749130                            | 0.368460  | 0.963926  |
| 2                | 6                | 0              | 0.886137                            | 1.633336  | 1.843558  |
| 3                | 6                | 0              | 1.248473                            | 2.896253  | 1.105345  |
| 4                | 6                | 0              | 1.374986                            | 2.983639  | -0.221867 |
| 5                | 6                | 0              | 1.259752                            | 1.738346  | -1.085415 |
| 6                | 6                | 0              | 0.242254                            | 0.731623  | -0.466774 |
| 7                | 6                | 0              | 2.119107                            | -0.390601 | 0.785912  |
| 8                | 6                | 0              | 2.648033                            | 1.082902  | -1.263912 |
| 9                | 6                | 0              | 3.190112                            | 0.514333  | 0.057317  |
| 10               | 6                | 0              | 0.173667                            | -0.526585 | -1.331950 |
| 11               | 6                | 0              | 1.873181                            | -1.675348 | -0.001097 |
| 12               | 6                | 0              | 1.001839                            | -1.695058 | -1.039180 |
| 13               | 8                | 0              | -0.587588                           | -0.591294 | -2.305100 |
| 14               | 8                | 0              | 0.772658                            | -2.765253 | -1.859942 |
| 15               | 6                | 0              | -1.193483                           | 1.365654  | -0.525832 |
| 16               | 8                | 0              | -1.337821                           | 2.481151  | -0.984966 |
| 17               | 6                | 0              | -2.401199                           | 0.567202  | -0.048823 |
| 18               | 6                | 0              | -3.673849                           | 0.918426  | -0.844257 |
| 19               | 6                | 0              | -4.887906                           | 0.171982  | -0.336175 |
| 20               | 6                | 0              | -5.197845                           | -1.107606 | -0.817743 |
| 21               | 6                | 0              | -6.298924                           | -1.812245 | -0.329715 |
| 22               | 6                | 0              | -7.113403                           | -1.246896 | 0.653371  |
| 23               | 6                | 0              | -6.817998                           | 0.027272  | 1.141322  |
| 24               | 6                | 0              | -5.715760                           | 0.727628  | 0.648994  |
| 25               | 1                | 0              | 0.876126                            | 2.022559  | -2.070003 |
| 26               | 6                | 0              | 1.654227                            | 4.276765  | -0.937659 |
| 27               | 8                | 0              | 2.597957                            | -0.704311 | 2.090921  |
| 28               | 6                | 0              | 4.559009                            | -0.150744 | -0.080870 |
| 29               | 6                | 0              | 4.930501                            | -0.853553 | -1.157798 |

|    |   |   |           |           |           |
|----|---|---|-----------|-----------|-----------|
| 30 | 6 | 0 | 5.518258  | 0.081731  | 1.063454  |
| 31 | 8 | 0 | -0.245029 | -0.510583 | 1.494300  |
| 32 | 6 | 0 | -0.180330 | -0.965017 | 2.842491  |
| 33 | 8 | 0 | 2.644938  | -2.684454 | 0.458933  |
| 34 | 6 | 0 | 2.805808  | -3.906475 | -0.280757 |
| 35 | 1 | 0 | 1.605155  | 1.440244  | 2.648908  |
| 36 | 1 | 0 | -0.084314 | 1.786451  | 2.338011  |
| 37 | 1 | 0 | 1.355305  | 3.789514  | 1.720041  |
| 38 | 1 | 0 | 3.358841  | 1.824367  | -1.646385 |
| 39 | 1 | 0 | 2.584838  | 0.301013  | -2.027351 |
| 40 | 1 | 0 | 3.322246  | 1.359506  | 0.741957  |
| 41 | 1 | 0 | 0.096824  | -2.425033 | -2.488077 |
| 42 | 1 | 0 | -2.199091 | -0.504249 | -0.081613 |
| 43 | 1 | 0 | -2.544747 | 0.805353  | 1.014197  |
| 44 | 1 | 0 | -3.837045 | 1.999050  | -0.791306 |
| 45 | 1 | 0 | -3.497049 | 0.677889  | -1.899229 |
| 46 | 1 | 0 | -4.570484 | -1.551512 | -1.588097 |
| 47 | 1 | 0 | -6.523918 | -2.801281 | -0.721144 |
| 48 | 1 | 0 | -7.973842 | -1.792396 | 1.032042  |
| 49 | 1 | 0 | -7.449509 | 0.479538  | 1.902060  |
| 50 | 1 | 0 | -5.496166 | 1.723568  | 1.028784  |
| 51 | 1 | 0 | 1.826629  | 5.098537  | -0.235223 |
| 52 | 1 | 0 | 2.532880  | 4.200038  | -1.592716 |
| 53 | 1 | 0 | 0.800557  | 4.540794  | -1.575045 |
| 54 | 1 | 0 | 3.032690  | -1.572388 | 2.022972  |
| 55 | 1 | 0 | 5.921927  | -1.295322 | -1.223802 |
| 56 | 1 | 0 | 4.279192  | -1.015473 | -2.011718 |
| 57 | 1 | 0 | 5.762549  | 1.150116  | 1.148431  |
| 58 | 1 | 0 | 5.070766  | -0.207211 | 2.020484  |
| 59 | 1 | 0 | 6.454656  | -0.468654 | 0.927124  |
| 60 | 1 | 0 | 0.061947  | -0.161114 | 3.546306  |
| 61 | 1 | 0 | -1.182450 | -1.341407 | 3.068642  |
| 62 | 1 | 0 | 0.548910  | -1.769759 | 2.969523  |
| 63 | 1 | 0 | 1.850196  | -4.418314 | -0.398875 |
| 64 | 1 | 0 | 3.239298  | -3.700053 | -1.261986 |
| 65 | 1 | 0 | 3.493509  | -4.508960 | 0.314719  |

| Center<br>Number | 1-3<br>Atomic<br>Number | Atomic<br>Type | Standard Orientation<br>(Ångstroms) |          |          |
|------------------|-------------------------|----------------|-------------------------------------|----------|----------|
|                  |                         |                | X                                   | Y        | Z        |
| 1                | 6                       | 0              | 0.643454                            | 0.272792 | 0.869418 |
| 2                | 6                       | 0              | 0.689058                            | 1.437534 | 1.886350 |
| 3                | 6                       | 0              | 1.116950                            | 2.768886 | 1.328767 |
| 4                | 6                       | 0              | 1.343574                            | 3.001277 | 0.033467 |

|    |   |   |           |           |           |
|----|---|---|-----------|-----------|-----------|
| 5  | 6 | 0 | 1.308123  | 1.860187  | -0.968789 |
| 6  | 6 | 0 | 0.263856  | 0.775837  | -0.561147 |
| 7  | 6 | 0 | 2.032337  | -0.459710 | 0.738490  |
| 8  | 6 | 0 | 2.714294  | 1.229123  | -1.101239 |
| 9  | 6 | 0 | 3.148390  | 0.517302  | 0.191435  |
| 10 | 6 | 0 | 0.320584  | -0.376423 | -1.564843 |
| 11 | 6 | 0 | 1.866896  | -1.666765 | -0.181599 |
| 12 | 6 | 0 | 1.107701  | -1.579264 | -1.300935 |
| 13 | 8 | 0 | -0.298529 | -0.317983 | -2.633803 |
| 14 | 8 | 0 | 0.978824  | -2.555504 | -2.250543 |
| 15 | 6 | 0 | -1.179676 | 1.378625  | -0.660395 |
| 16 | 8 | 0 | -1.328482 | 2.574828  | -0.813933 |
| 17 | 6 | 0 | -2.399365 | 0.461828  | -0.619747 |
| 18 | 6 | 0 | -3.469813 | 0.990462  | 0.360597  |
| 19 | 6 | 0 | -4.758788 | 0.201344  | 0.288379  |
| 20 | 6 | 0 | -5.760967 | 0.549335  | -0.628083 |
| 21 | 6 | 0 | -6.939495 | -0.191803 | -0.719279 |
| 22 | 6 | 0 | -7.137948 | -1.298248 | 0.108992  |
| 23 | 6 | 0 | -6.149496 | -1.655372 | 1.027542  |
| 24 | 6 | 0 | -4.972388 | -0.910478 | 1.113813  |
| 25 | 1 | 0 | 1.005465  | 2.250976  | -1.945886 |
| 26 | 6 | 0 | 1.670460  | 4.364747  | -0.511262 |
| 27 | 8 | 0 | 2.410147  | -0.890055 | 2.043379  |
| 28 | 6 | 0 | 4.527835  | -0.133558 | 0.093719  |
| 29 | 6 | 0 | 4.972049  | -0.753143 | -1.006246 |
| 30 | 6 | 0 | 5.404757  | 0.008236  | 1.315947  |
| 31 | 8 | 0 | -0.391116 | -0.650486 | 1.222461  |
| 32 | 6 | 0 | -0.409524 | -1.271519 | 2.504140  |
| 33 | 8 | 0 | 2.592319  | -2.718910 | 0.256803  |
| 34 | 6 | 0 | 2.774769  | -3.895592 | -0.548423 |
| 35 | 1 | 0 | 1.325984  | 1.152461  | 2.732273  |
| 36 | 1 | 0 | -0.326541 | 1.543669  | 2.295165  |
| 37 | 1 | 0 | 1.172889  | 3.587741  | 2.045182  |
| 38 | 1 | 0 | 2.724976  | 0.537925  | -1.949869 |
| 39 | 1 | 0 | 3.449105  | 2.007850  | -1.335645 |
| 40 | 1 | 0 | 3.220459  | 1.284645  | 0.969896  |
| 41 | 1 | 0 | 0.384719  | -2.143436 | -2.917039 |
| 42 | 1 | 0 | -2.808513 | 0.456428  | -1.637800 |
| 43 | 1 | 0 | -2.122280 | -0.562102 | -0.370098 |
| 44 | 1 | 0 | -3.065303 | 0.948100  | 1.379585  |
| 45 | 1 | 0 | -3.654753 | 2.044833  | 0.130829  |
| 46 | 1 | 0 | -5.615675 | 1.413734  | -1.272841 |
| 47 | 1 | 0 | -7.705598 | 0.098179  | -1.434003 |
| 48 | 1 | 0 | -8.056863 | -1.874661 | 0.041580  |

|    |   |   |           |           |           |
|----|---|---|-----------|-----------|-----------|
| 49 | 1 | 0 | -6.296168 | -2.512097 | 1.680598  |
| 50 | 1 | 0 | -4.207925 | -1.191295 | 1.835837  |
| 51 | 1 | 0 | 1.788406  | 5.101637  | 0.289645  |
| 52 | 1 | 0 | 2.593775  | 4.359161  | -1.106657 |
| 53 | 1 | 0 | 0.863266  | 4.703690  | -1.173658 |
| 54 | 1 | 0 | 2.859707  | -1.745836 | 1.930807  |
| 55 | 1 | 0 | 5.967089  | -1.190405 | -1.040434 |
| 56 | 1 | 0 | 4.377623  | -0.849254 | -1.910080 |
| 57 | 1 | 0 | 5.635403  | 1.066590  | 1.503148  |
| 58 | 1 | 0 | 4.893265  | -0.357269 | 2.213107  |
| 59 | 1 | 0 | 6.351918  | -0.528703 | 1.202105  |
| 60 | 1 | 0 | -0.214472 | -0.563839 | 3.317057  |
| 61 | 1 | 0 | -1.422365 | -1.670113 | 2.617327  |
| 62 | 1 | 0 | 0.312139  | -2.090095 | 2.574128  |
| 63 | 1 | 0 | 1.816086  | -4.366585 | -0.769649 |
| 64 | 1 | 0 | 3.286162  | -3.643276 | -1.479778 |
| 65 | 1 | 0 | 3.396958  | -4.557609 | 0.055846  |

| Center<br>Number | 1-4<br>Atomic<br>Number | Atomic<br>Type | Standard Orientation<br>(Ångstroms) |           |           |
|------------------|-------------------------|----------------|-------------------------------------|-----------|-----------|
|                  |                         |                | X                                   | Y         | Z         |
| 1                | 6                       | 0              | -0.129195                           | -0.046295 | -0.524447 |
| 2                | 6                       | 0              | 0.638489                            | 1.003370  | -1.359822 |
| 3                | 6                       | 0              | 0.600742                            | 2.410224  | -0.824142 |
| 4                | 6                       | 0              | 0.063286                            | 2.754595  | 0.349046  |
| 5                | 6                       | 0              | -0.687530                           | 1.725881  | 1.178841  |
| 6                | 6                       | 0              | -0.069602                           | 0.300906  | 1.001519  |
| 7                | 6                       | 0              | -1.656761                           | -0.133016 | -0.912156 |
| 8                | 6                       | 0              | -2.185624                           | 1.737403  | 0.789612  |
| 9                | 6                       | 0              | -2.400024                           | 1.236903  | -0.647700 |
| 10               | 6                       | 0              | -0.892307                           | -0.707139 | 1.806993  |
| 11               | 6                       | 0              | -2.300021                           | -1.267704 | -0.114582 |
| 12               | 6                       | 0              | -1.972988                           | -1.465891 | 1.187494  |
| 13               | 8                       | 0              | -0.686088                           | -0.882925 | 3.015050  |
| 14               | 8                       | 0              | -2.600601                           | -2.343830 | 2.031214  |
| 15               | 6                       | 0              | 1.379516                            | 0.302582  | 1.609249  |
| 16               | 8                       | 0              | 1.876040                            | 1.350106  | 1.976084  |
| 17               | 6                       | 0              | 2.118894                            | -1.015285 | 1.816407  |
| 18               | 6                       | 0              | 3.653352                            | -0.861337 | 1.816641  |
| 19               | 6                       | 0              | 4.241570                            | -0.605917 | 0.443011  |
| 20               | 6                       | 0              | 4.464995                            | 0.698895  | -0.020340 |
| 21               | 6                       | 0              | 4.985887                            | 0.926185  | -1.296194 |
| 22               | 6                       | 0              | 5.294539                            | -0.148139 | -2.132719 |
| 23               | 6                       | 0              | 5.080599                            | -1.452434 | -1.682168 |

|    |   |   |           |           |           |
|----|---|---|-----------|-----------|-----------|
| 24 | 6 | 0 | 4.560315  | -1.675143 | -0.406474 |
| 25 | 1 | 0 | -0.599573 | 1.986877  | 2.238343  |
| 26 | 6 | 0 | 0.132093  | 4.149449  | 0.908008  |
| 27 | 8 | 0 | -1.706664 | -0.413817 | -2.299488 |
| 28 | 6 | 0 | -3.862960 | 1.197554  | -1.080839 |
| 29 | 6 | 0 | -4.192156 | 1.509589  | -2.343262 |
| 30 | 6 | 0 | -4.926818 | 0.822714  | -0.074837 |
| 31 | 8 | 0 | 0.473669  | -1.336038 | -0.648804 |
| 32 | 6 | 0 | 0.764982  | -1.883575 | -1.933723 |
| 33 | 8 | 0 | -3.247530 | -1.905859 | -0.831160 |
| 34 | 6 | 0 | -3.809215 | -3.145732 | -0.370261 |
| 35 | 1 | 0 | 0.274428  | 0.975229  | -2.393345 |
| 36 | 1 | 0 | 1.688870  | 0.680285  | -1.395376 |
| 37 | 1 | 0 | 1.113426  | 3.159880  | -1.426033 |
| 38 | 1 | 0 | -2.571198 | 2.761108  | 0.872496  |
| 39 | 1 | 0 | -2.757329 | 1.136407  | 1.504457  |
| 40 | 1 | 0 | -1.892784 | 1.936350  | -1.317999 |
| 41 | 1 | 0 | -2.125440 | -2.213359 | 2.882113  |
| 42 | 1 | 0 | 1.789458  | -1.376271 | 2.799927  |
| 43 | 1 | 0 | 1.788148  | -1.749225 | 1.080466  |
| 44 | 1 | 0 | 3.922937  | -0.048074 | 2.497183  |
| 45 | 1 | 0 | 4.082229  | -1.783346 | 2.227688  |
| 46 | 1 | 0 | 4.221853  | 1.537981  | 0.625219  |
| 47 | 1 | 0 | 5.156342  | 1.945559  | -1.633806 |
| 48 | 1 | 0 | 5.704786  | 0.028727  | -3.123597 |
| 49 | 1 | 0 | 5.325954  | -2.297329 | -2.321010 |
| 50 | 1 | 0 | 4.405353  | -2.695111 | -0.059495 |
| 51 | 1 | 0 | 0.590262  | 4.846064  | 0.198525  |
| 52 | 1 | 0 | -0.861963 | 4.537624  | 1.169835  |
| 53 | 1 | 0 | 0.730291  | 4.152602  | 1.828530  |
| 54 | 1 | 0 | -2.649220 | -0.480999 | -2.533782 |
| 55 | 1 | 0 | -5.223082 | 1.478531  | -2.688161 |
| 56 | 1 | 0 | -3.447370 | 1.830472  | -3.067361 |
| 57 | 1 | 0 | -4.708094 | -0.125512 | 0.427275  |
| 58 | 1 | 0 | -5.010126 | 1.584425  | 0.711112  |
| 59 | 1 | 0 | -5.905173 | 0.735083  | -0.557143 |
| 60 | 1 | 0 | 1.353327  | -1.197521 | -2.553186 |
| 61 | 1 | 0 | 1.371387  | -2.771156 | -1.733873 |
| 62 | 1 | 0 | -0.143969 | -2.162803 | -2.471167 |
| 63 | 1 | 0 | -3.015381 | -3.864452 | -0.151341 |
| 64 | 1 | 0 | -4.421036 | -2.997992 | 0.520932  |
| 65 | 1 | 0 | -4.422264 | -3.503016 | -1.199514 |

| Center<br>Number | Atomic<br>Number | Atomic<br>Type | (Ångstroms) |           |           |
|------------------|------------------|----------------|-------------|-----------|-----------|
|                  |                  |                | X           | Y         | Z         |
| 1                | 6                | 0              | 0.757642    | 0.373322  | 0.989029  |
| 2                | 6                | 0              | 0.884928    | 1.631128  | 1.880308  |
| 3                | 6                | 0              | 1.247874    | 2.901695  | 1.155753  |
| 4                | 6                | 0              | 1.384388    | 3.001780  | -0.169606 |
| 5                | 6                | 0              | 1.280372    | 1.763236  | -1.044872 |
| 6                | 6                | 0              | 0.259769    | 0.748870  | -0.440698 |
| 7                | 6                | 0              | 2.130978    | -0.381184 | 0.810152  |
| 8                | 6                | 0              | 2.675729    | 1.118840  | -1.219690 |
| 9                | 6                | 0              | 3.204197    | 0.541299  | 0.102510  |
| 10               | 6                | 0              | 0.192541    | -0.500327 | -1.318940 |
| 11               | 6                | 0              | 1.890300    | -1.659812 | 0.005751  |
| 12               | 6                | 0              | 1.024271    | -1.665636 | -1.039336 |
| 13               | 8                | 0              | -0.557516   | -0.547662 | -2.302725 |
| 14               | 8                | 0              | 0.838130    | -2.710655 | -1.904635 |
| 15               | 6                | 0              | -1.175322   | 1.384146  | -0.502168 |
| 16               | 8                | 0              | -1.317732   | 2.503166  | -0.953372 |
| 17               | 6                | 0              | -2.385439   | 0.580066  | -0.041039 |
| 18               | 6                | 0              | -3.651991   | 0.935875  | -0.844206 |
| 19               | 6                | 0              | -4.867540   | 0.177705  | -0.357652 |
| 20               | 6                | 0              | -5.165570   | -1.097725 | -0.857514 |
| 21               | 6                | 0              | -6.268303   | -1.813598 | -0.390058 |
| 22               | 6                | 0              | -7.096478   | -1.263928 | 0.590477  |
| 23               | 6                | 0              | -6.813024   | 0.005866  | 1.096546  |
| 24               | 6                | 0              | -5.709038   | 0.717543  | 0.624740  |
| 25               | 1                | 0              | 0.903018    | 2.054100  | -2.029833 |
| 26               | 6                | 0              | 1.662174    | 4.302693  | -0.871754 |
| 27               | 8                | 0              | 2.592080    | -0.696228 | 2.111909  |
| 28               | 6                | 0              | 4.566991    | -0.135943 | -0.013507 |
| 29               | 6                | 0              | 5.447278    | -0.037001 | 0.993669  |
| 30               | 6                | 0              | 4.915443    | -0.894968 | -1.273109 |
| 31               | 8                | 0              | -0.237435   | -0.512539 | 1.505363  |
| 32               | 6                | 0              | -0.169421   | -0.979957 | 2.850408  |
| 33               | 8                | 0              | 2.697959    | -2.659841 | 0.414056  |
| 34               | 6                | 0              | 2.508206    | -4.003530 | -0.059908 |
| 35               | 1                | 0              | 1.599374    | 1.431530  | 2.687590  |
| 36               | 1                | 0              | -0.089740   | 1.776863  | 2.368528  |
| 37               | 1                | 0              | 1.345923    | 3.790126  | 1.778923  |
| 38               | 1                | 0              | 3.379617    | 1.876154  | -1.586405 |
| 39               | 1                | 0              | 2.628034    | 0.344868  | -1.992859 |
| 40               | 1                | 0              | 3.326000    | 1.374418  | 0.800579  |
| 41               | 1                | 0              | 0.148449    | -2.372135 | -2.518374 |
| 42               | 1                | 0              | -2.181153   | -0.490691 | -0.081678 |

|    |   |   |           |           |           |
|----|---|---|-----------|-----------|-----------|
| 43 | 1 | 0 | -2.537930 | 0.808453  | 1.022858  |
| 44 | 1 | 0 | -3.820651 | 2.015021  | -0.779465 |
| 45 | 1 | 0 | -3.463766 | 0.709191  | -1.900255 |
| 46 | 1 | 0 | -4.527470 | -1.529364 | -1.626026 |
| 47 | 1 | 0 | -6.483899 | -2.799067 | -0.795542 |
| 48 | 1 | 0 | -7.958224 | -1.818131 | 0.953221  |
| 49 | 1 | 0 | -7.455213 | 0.445947  | 1.855493  |
| 50 | 1 | 0 | -5.498889 | 1.710036  | 1.018647  |
| 51 | 1 | 0 | 1.826052  | 5.118688  | -0.160631 |
| 52 | 1 | 0 | 2.545473  | 4.236781  | -1.521824 |
| 53 | 1 | 0 | 0.811241  | 4.568460  | -1.512051 |
| 54 | 1 | 0 | 3.427488  | -1.183176 | 1.999434  |
| 55 | 1 | 0 | 6.421947  | -0.517279 | 0.948700  |
| 56 | 1 | 0 | 5.233961  | 0.546648  | 1.885661  |
| 57 | 1 | 0 | 4.157192  | -1.641599 | -1.531327 |
| 58 | 1 | 0 | 4.994888  | -0.215871 | -2.131796 |
| 59 | 1 | 0 | 5.876120  | -1.407691 | -1.165385 |
| 60 | 1 | 0 | -0.011115 | -0.165737 | 3.567459  |
| 61 | 1 | 0 | -1.145225 | -1.433905 | 3.045335  |
| 62 | 1 | 0 | 0.620692  | -1.722549 | 2.984803  |
| 63 | 1 | 0 | 1.483710  | -4.333473 | 0.129535  |
| 64 | 1 | 0 | 2.723561  | -4.081974 | -1.126670 |
| 65 | 1 | 0 | 3.210909  | -4.607294 | 0.516880  |

| Center<br>Number | 1-6<br>Atomic<br>Number | Atomic<br>Type | Standard Orientation<br>(Ångstroms) |           |           |
|------------------|-------------------------|----------------|-------------------------------------|-----------|-----------|
|                  |                         |                | X                                   | Y         | Z         |
| 1                | 6                       | 0              | 1.014150                            | 0.543556  | 1.146879  |
| 2                | 6                       | 0              | 1.335704                            | 1.963890  | 1.670098  |
| 3                | 6                       | 0              | 1.214589                            | 3.067324  | 0.650887  |
| 4                | 6                       | 0              | 0.794550                            | 2.890812  | -0.605269 |
| 5                | 6                       | 0              | 0.498520                            | 1.493999  | -1.125696 |
| 6                | 6                       | 0              | -0.061707                           | 0.589358  | 0.015758  |
| 7                | 6                       | 0              | 2.283322                            | -0.174763 | 0.547010  |
| 8                | 6                       | 0              | 1.768318                            | 0.874622  | -1.750433 |
| 9                | 6                       | 0              | 2.857022                            | 0.609734  | -0.699061 |
| 10               | 6                       | 0              | -0.308555                           | -0.819407 | -0.526701 |
| 11               | 6                       | 0              | 1.905991                            | -1.601888 | 0.160050  |
| 12               | 6                       | 0              | 0.702119                            | -1.870639 | -0.399624 |
| 13               | 8                       | 0              | -1.368073                           | -1.108426 | -1.091657 |
| 14               | 8                       | 0              | 0.297855                            | -3.092597 | -0.860875 |
| 15               | 6                       | 0              | -1.471228                           | 1.142729  | 0.442640  |
| 16               | 8                       | 0              | -1.917197                           | 2.125119  | -0.117003 |
| 17               | 6                       | 0              | -2.264052                           | 0.445700  | 1.542274  |

|    |   |   |           |           |           |
|----|---|---|-----------|-----------|-----------|
| 18 | 6 | 0 | -3.766032 | 0.796343  | 1.544394  |
| 19 | 6 | 0 | -4.578686 | 0.080126  | 0.483430  |
| 20 | 6 | 0 | -4.775881 | 0.639438  | -0.786566 |
| 21 | 6 | 0 | -5.519627 | -0.034306 | -1.755945 |
| 22 | 6 | 0 | -6.080865 | -1.280836 | -1.473683 |
| 23 | 6 | 0 | -5.893151 | -1.848585 | -0.212503 |
| 24 | 6 | 0 | -5.149942 | -1.170800 | 0.754560  |
| 25 | 1 | 0 | -0.275150 | 1.558180  | -1.896527 |
| 26 | 6 | 0 | 0.609026  | 4.024934  | -1.575931 |
| 27 | 8 | 0 | 3.276376  | -0.195096 | 1.569174  |
| 28 | 6 | 0 | 4.128414  | -0.008730 | -1.278220 |
| 29 | 6 | 0 | 4.124756  | -0.897218 | -2.279265 |
| 30 | 6 | 0 | 5.426340  | 0.492489  | -0.688472 |
| 31 | 8 | 0 | 0.431147  | -0.254543 | 2.179901  |
| 32 | 6 | 0 | 1.100441  | -0.450255 | 3.421564  |
| 33 | 8 | 0 | 2.918515  | -2.460957 | 0.417115  |
| 34 | 6 | 0 | 2.929400  | -3.791620 | -0.125876 |
| 35 | 1 | 0 | 2.335818  | 1.967496  | 2.120160  |
| 36 | 1 | 0 | 0.636014  | 2.170396  | 2.493297  |
| 37 | 1 | 0 | 1.445993  | 4.070039  | 1.008986  |
| 38 | 1 | 0 | 2.171126  | 1.551354  | -2.512794 |
| 39 | 1 | 0 | 1.500151  | -0.047961 | -2.274793 |
| 40 | 1 | 0 | 3.146183  | 1.581388  | -0.282832 |
| 41 | 1 | 0 | -0.604678 | -2.914108 | -1.209343 |
| 42 | 1 | 0 | -2.107423 | -0.634664 | 1.494233  |
| 43 | 1 | 0 | -1.809165 | 0.761167  | 2.490324  |
| 44 | 1 | 0 | -4.163936 | 0.535978  | 2.532857  |
| 45 | 1 | 0 | -3.871289 | 1.879721  | 1.430675  |
| 46 | 1 | 0 | -4.335401 | 1.605896  | -1.012733 |
| 47 | 1 | 0 | -5.662337 | 0.417597  | -2.734494 |
| 48 | 1 | 0 | -6.662687 | -1.803700 | -2.228503 |
| 49 | 1 | 0 | -6.330211 | -2.816339 | 0.021432  |
| 50 | 1 | 0 | -5.015536 | -1.616401 | 1.738719  |
| 51 | 1 | 0 | 0.939613  | 4.978444  | -1.151623 |
| 52 | 1 | 0 | 1.163488  | 3.858320  | -2.509641 |
| 53 | 1 | 0 | -0.451437 | 4.115593  | -1.844138 |
| 54 | 1 | 0 | 3.747207  | -1.041946 | 1.476847  |
| 55 | 1 | 0 | 5.054495  | -1.298877 | -2.675168 |
| 56 | 1 | 0 | 3.213244  | -1.256028 | -2.747994 |
| 57 | 1 | 0 | 5.550187  | 1.565973  | -0.890395 |
| 58 | 1 | 0 | 5.433757  | 0.383120  | 0.401285  |
| 59 | 1 | 0 | 6.292137  | -0.031603 | -1.105699 |
| 60 | 1 | 0 | 1.553126  | 0.469897  | 3.806061  |
| 61 | 1 | 0 | 0.325902  | -0.782546 | 4.119828  |



|    |   |   |          |           |           |
|----|---|---|----------|-----------|-----------|
| 62 | 1 | 0 | 1.877646 | -1.216415 | 3.351130  |
| 63 | 1 | 0 | 2.082844 | -4.370664 | 0.244790  |
| 64 | 1 | 0 | 2.903041 | -3.755710 | -1.217505 |
| 65 | 1 | 0 | 3.870685 | -4.227634 | 0.212538  |

**Table S3.** Gibbs free energies ( $\Delta G$ )<sup>a</sup> and Boltzmann distribution (P%)<sup>b</sup> of low-energy conformers of **2**.

| Conformers | In MeOH    |          |
|------------|------------|----------|
|            | $\Delta G$ | P(%)/100 |
| <b>2-1</b> | 0.00       | 0.488    |
| <b>2-2</b> | 1.66       | 0.250    |
| <b>2-3</b> | 3.85       | 0.103    |
| <b>2-4</b> | 5.64       | 0.050    |
| <b>2-5</b> | 6.67       | 0.033    |

<sup>a</sup> B3LYP/6-31g, in kcal/mol. <sup>b</sup> From  $\Delta G$  values at 298.15 K.

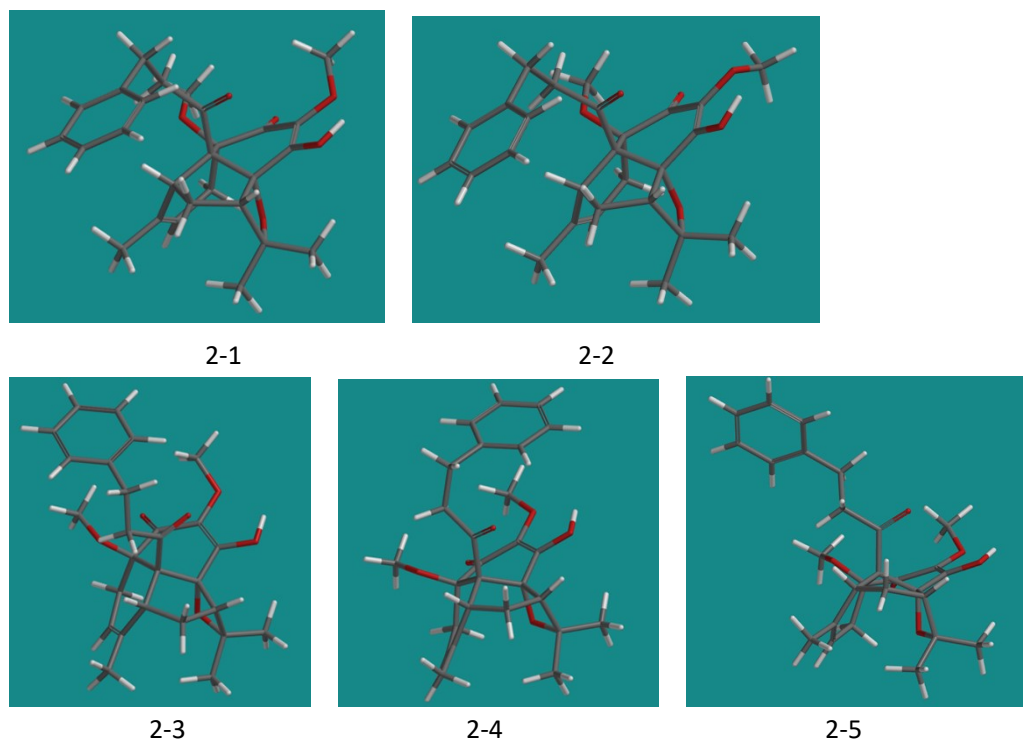

**Table S4.** Cartesian coordinates for the low-energy reoptimized MMFF conformers of **2** at B3LYP/6-31+G(d,p) level of theory in CH<sub>3</sub>OH.

| Center Number | 2-1           |             | Standard Orientation (Ångstroms) |           |           |
|---------------|---------------|-------------|----------------------------------|-----------|-----------|
|               | Atomic Number | Atomic Type | X                                | Y         | Z         |
| 1             | 6             | 0           | 1.365417                         | -0.666802 | 1.301644  |
| 2             | 6             | 0           | 0.309864                         | -0.079190 | 0.316762  |
| 3             | 6             | 0           | 1.064026                         | 0.909415  | -0.625342 |
| 4             | 6             | 0           | 1.993893                         | 0.165991  | -1.511182 |

|    |   |   |           |           |           |
|----|---|---|-----------|-----------|-----------|
| 5  | 6 | 0 | 2.778239  | -0.778464 | -0.968920 |
| 6  | 6 | 0 | 2.680199  | -1.049713 | 0.517664  |
| 7  | 8 | 0 | 3.634113  | -1.580434 | 1.094897  |
| 8  | 8 | 0 | 2.000440  | 0.456555  | -2.859702 |
| 9  | 8 | 0 | 1.769869  | 2.000402  | 0.068654  |
| 10 | 6 | 0 | -0.822584 | 0.786195  | 0.915427  |
| 11 | 6 | 0 | -1.217290 | 1.713797  | -0.264407 |
| 12 | 6 | 0 | 0.029618  | 1.925861  | -1.136158 |
| 13 | 6 | 0 | 1.066623  | 3.007105  | -0.713991 |
| 14 | 6 | 0 | 1.952829  | 3.563029  | -1.831655 |
| 15 | 6 | 0 | 0.608045  | 4.156843  | 0.177442  |
| 16 | 6 | 0 | 1.779116  | 0.374711  | 2.385338  |
| 17 | 6 | 0 | 0.665372  | 1.261193  | 2.872352  |
| 18 | 6 | 0 | -0.501946 | 1.452891  | 2.234830  |
| 19 | 6 | 0 | -1.595402 | 2.278761  | 2.862038  |
| 20 | 1 | 0 | -1.708772 | 0.183002  | 1.140556  |
| 21 | 1 | 0 | -0.194622 | 1.908829  | -2.207737 |
| 22 | 6 | 0 | -0.420757 | -1.219742 | -0.484242 |
| 23 | 8 | 0 | -0.331253 | -1.297878 | -1.714098 |
| 24 | 6 | 0 | -1.248759 | -2.273700 | 0.251534  |
| 25 | 6 | 0 | -2.482077 | -2.718313 | -0.536949 |
| 26 | 6 | 0 | -3.549830 | -1.653984 | -0.613844 |
| 27 | 6 | 0 | -3.751031 | -0.937341 | -1.800561 |
| 28 | 6 | 0 | -4.726730 | 0.058150  | -1.869300 |
| 29 | 6 | 0 | -5.508438 | 0.347780  | -0.752768 |
| 30 | 6 | 0 | -5.317511 | -0.359709 | 0.432514  |
| 31 | 6 | 0 | -4.344189 | -1.357456 | 0.502231  |
| 32 | 8 | 0 | 3.668214  | -1.450520 | -1.800123 |
| 33 | 6 | 0 | 3.888831  | -2.816014 | -1.458227 |
| 34 | 8 | 0 | 0.734272  | -1.756689 | 2.001792  |
| 35 | 6 | 0 | 1.570902  | -2.715883 | 2.634684  |
| 36 | 1 | 0 | 2.645122  | -0.153823 | -3.268906 |
| 37 | 1 | 0 | -1.971182 | 1.201398  | -0.872208 |
| 38 | 1 | 0 | -1.673050 | 2.657317  | 0.045594  |
| 39 | 1 | 0 | 2.401444  | 2.788311  | -2.452912 |
| 40 | 1 | 0 | 2.777991  | 4.153624  | -1.417875 |
| 41 | 1 | 0 | 1.370790  | 4.215500  | -2.491738 |
| 42 | 1 | 0 | 0.117605  | 3.815253  | 1.087552  |
| 43 | 1 | 0 | -0.092358 | 4.806111  | -0.358607 |
| 44 | 1 | 0 | 1.458614  | 4.770493  | 0.495288  |
| 45 | 1 | 0 | 2.607309  | 1.008340  | 2.048522  |
| 46 | 1 | 0 | 2.167394  | -0.143018 | 3.269816  |
| 47 | 1 | 0 | 0.850659  | 1.761281  | 3.821346  |
| 48 | 1 | 0 | -1.319460 | 2.634323  | 3.860642  |

|    |   |   |           |           |           |
|----|---|---|-----------|-----------|-----------|
| 49 | 1 | 0 | -1.827769 | 3.157642  | 2.255059  |
| 50 | 1 | 0 | -2.506417 | 1.680407  | 2.967754  |
| 51 | 1 | 0 | -0.597876 | -3.144165 | 0.393583  |
| 52 | 1 | 0 | -1.554476 | -1.917385 | 1.238044  |
| 53 | 1 | 0 | -2.200947 | -3.042158 | -1.546728 |
| 54 | 1 | 0 | -2.916184 | -3.603315 | -0.053844 |
| 55 | 1 | 0 | -3.139188 | -1.144198 | -2.677208 |
| 56 | 1 | 0 | -4.873441 | 0.608881  | -2.794754 |
| 57 | 1 | 0 | -6.268219 | 1.122813  | -0.807721 |
| 58 | 1 | 0 | -5.929715 | -0.136798 | 1.302430  |
| 59 | 1 | 0 | -4.209653 | -1.902983 | 1.433638  |
| 60 | 1 | 0 | 4.657179  | -2.900233 | -0.684935 |
| 61 | 1 | 0 | 2.963593  | -3.315907 | -1.151140 |
| 62 | 1 | 0 | 4.264159  | -3.325252 | -2.351133 |
| 63 | 1 | 0 | 0.935034  | -3.347319 | 3.262117  |
| 64 | 1 | 0 | 2.326327  | -2.257567 | 3.276246  |
| 65 | 1 | 0 | 2.036289  | -3.363355 | 1.886405  |

| Center<br>Number | 2-2              |                | Standard Orientation<br>(Ångstroms) |           |           |
|------------------|------------------|----------------|-------------------------------------|-----------|-----------|
|                  | Atomic<br>Number | Atomic<br>Type | X                                   | Y         | Z         |
| 1                | 6                | 0              | 1.268789                            | -0.892279 | 1.225084  |
| 2                | 6                | 0              | 0.258546                            | -0.161995 | 0.290282  |
| 3                | 6                | 0              | 1.069956                            | 0.874861  | -0.542945 |
| 4                | 6                | 0              | 1.977239                            | 0.175430  | -1.485006 |
| 5                | 6                | 0              | 2.736384                            | -0.827226 | -1.016912 |
| 6                | 6                | 0              | 2.579736                            | -1.266295 | 0.426102  |
| 7                | 8                | 0              | 3.478480                            | -1.922738 | 0.960910  |
| 8                | 8                | 0              | 1.999643                            | 0.575436  | -2.804872 |
| 9                | 8                | 0              | 1.816742                            | 1.860796  | 0.257720  |
| 10               | 6                | 0              | -0.841251                           | 0.693318  | 0.960595  |
| 11               | 6                | 0              | -1.177079                           | 1.748214  | -0.127175 |
| 12               | 6                | 0              | 0.090208                            | 1.982764  | -0.963811 |
| 13               | 6                | 0              | 1.171027                            | 2.968566  | -0.432980 |
| 14               | 6                | 0              | 2.096331                            | 3.581932  | -1.487185 |
| 15               | 6                | 0              | 0.755621                            | 4.050682  | 0.558402  |
| 16               | 6                | 0              | 1.719227                            | 0.021977  | 2.405458  |
| 17               | 6                | 0              | 0.643033                            | 0.911640  | 2.965648  |
| 18               | 6                | 0              | -0.506464                           | 1.217003  | 2.340042  |
| 19               | 6                | 0              | -1.568787                           | 2.029739  | 3.034225  |
| 20               | 1                | 0              | -1.755860                           | 0.110929  | 1.119072  |
| 21               | 1                | 0              | -0.120864                           | 2.077418  | -2.034041 |
| 22               | 6                | 0              | -0.516642                           | -1.174568 | -0.631382 |
| 23               | 8                | 0              | -0.444991                           | -1.100617 | -1.862793 |

|    |   |   |           |           |           |
|----|---|---|-----------|-----------|-----------|
| 24 | 6 | 0 | -1.379975 | -2.275653 | -0.016522 |
| 25 | 6 | 0 | -2.622075 | -2.594167 | -0.851258 |
| 26 | 6 | 0 | -3.657957 | -1.496394 | -0.808167 |
| 27 | 6 | 0 | -3.828436 | -0.640069 | -1.903544 |
| 28 | 6 | 0 | -4.772851 | 0.386472  | -1.859143 |
| 29 | 6 | 0 | -5.553907 | 0.567687  | -0.719537 |
| 30 | 6 | 0 | -5.393390 | -0.279001 | 0.375570  |
| 31 | 6 | 0 | -4.451142 | -1.307598 | 0.331925  |
| 32 | 8 | 0 | 3.597241  | -1.467546 | -1.902014 |
| 33 | 6 | 0 | 4.911143  | -1.682848 | -1.393356 |
| 34 | 8 | 0 | 0.568532  | -2.001004 | 1.821406  |
| 35 | 6 | 0 | 1.339797  | -3.066395 | 2.359817  |
| 36 | 1 | 0 | 2.559585  | -0.070929 | -3.278557 |
| 37 | 1 | 0 | -1.946929 | 1.333755  | -0.787718 |
| 38 | 1 | 0 | -1.591390 | 2.678554  | 0.268852  |
| 39 | 1 | 0 | 2.512655  | 2.846949  | -2.175873 |
| 40 | 1 | 0 | 2.944912  | 4.088696  | -1.013930 |
| 41 | 1 | 0 | 1.554821  | 4.321943  | -2.086635 |
| 42 | 1 | 0 | 0.237855  | 3.649345  | 1.428207  |
| 43 | 1 | 0 | 0.093470  | 4.780033  | 0.079806  |
| 44 | 1 | 0 | 1.629964  | 4.590397  | 0.939548  |
| 45 | 1 | 0 | 2.581173  | 0.642954  | 2.136675  |
| 46 | 1 | 0 | 2.071400  | -0.595966 | 3.239522  |
| 47 | 1 | 0 | 0.839208  | 1.310062  | 3.959461  |
| 48 | 1 | 0 | -1.290159 | 2.274120  | 4.064968  |
| 49 | 1 | 0 | -1.751789 | 2.972969  | 2.513002  |
| 50 | 1 | 0 | -2.507940 | 1.467959  | 3.073471  |
| 51 | 1 | 0 | -0.756732 | -3.175704 | 0.034920  |
| 52 | 1 | 0 | -1.684201 | -2.013612 | 0.999652  |
| 53 | 1 | 0 | -2.347021 | -2.811232 | -1.890834 |
| 54 | 1 | 0 | -3.083616 | -3.514306 | -0.469972 |
| 55 | 1 | 0 | -3.216177 | -0.762089 | -2.795715 |
| 56 | 1 | 0 | -4.895660 | 1.045745  | -2.714420 |
| 57 | 1 | 0 | -6.289445 | 1.366925  | -0.686435 |
| 58 | 1 | 0 | -6.004916 | -0.140434 | 1.263271  |
| 59 | 1 | 0 | -4.339567 | -1.961845 | 1.193738  |
| 60 | 1 | 0 | 4.955365  | -2.622208 | -0.835223 |
| 61 | 1 | 0 | 5.586162  | -1.778449 | -2.249413 |
| 62 | 1 | 0 | 5.260022  | -0.841690 | -0.784329 |
| 63 | 1 | 0 | 1.770558  | -3.666540 | 1.553680  |
| 64 | 1 | 0 | 0.661621  | -3.714833 | 2.922274  |
| 65 | 1 | 0 | 2.115837  | -2.718320 | 3.044766  |

| Center<br>Number | Atomic<br>Number | Atomic<br>Type | (Ångstroms) |           |           |
|------------------|------------------|----------------|-------------|-----------|-----------|
|                  |                  |                | X           | Y         | Z         |
| 1                | 6                | 0              | -0.095924   | -0.318916 | 1.199393  |
| 2                | 6                | 0              | -0.723030   | -0.505123 | -0.210057 |
| 3                | 6                | 0              | -1.791265   | 0.616610  | -0.393840 |
| 4                | 6                | 0              | -1.148184   | 1.951220  | -0.454864 |
| 5                | 6                | 0              | -0.202125   | 2.251660  | 0.449168  |
| 6                | 6                | 0              | 0.189203    | 1.210392  | 1.477176  |
| 7                | 8                | 0              | 0.722181    | 1.576406  | 2.529725  |
| 8                | 8                | 0              | -1.522074   | 2.821638  | -1.458341 |
| 9                | 8                | 0              | -2.868461   | 0.607958  | 0.613064  |
| 10               | 6                | 0              | -1.525133   | -1.804457 | -0.463262 |
| 11               | 6                | 0              | -2.485606   | -1.390305 | -1.609379 |
| 12               | 6                | 0              | -2.794877   | 0.106973  | -1.442884 |
| 13               | 6                | 0              | -3.890347   | 0.540195  | -0.423051 |
| 14               | 6                | 0              | -4.537678   | 1.907221  | -0.660827 |
| 15               | 6                | 0              | -4.976849   | -0.461033 | -0.043482 |
| 16               | 6                | 0              | -1.065924   | -0.782824 | 2.329308  |
| 17               | 6                | 0              | -1.917618   | -1.977589 | 1.999641  |
| 18               | 6                | 0              | -2.134404   | -2.449921 | 0.761003  |
| 19               | 6                | 0              | -2.912538   | -3.723252 | 0.549523  |
| 20               | 1                | 0              | -0.893187   | -2.604276 | -0.860739 |
| 21               | 1                | 0              | -2.829279   | 0.641494  | -2.397749 |
| 22               | 6                | 0              | 0.412927    | -0.444436 | -1.305103 |
| 23               | 8                | 0              | 0.633547    | 0.587841  | -1.946129 |
| 24               | 6                | 0              | 1.221328    | -1.700509 | -1.646230 |
| 25               | 6                | 0              | 2.571712    | -1.400051 | -2.300957 |
| 26               | 6                | 0              | 3.617257    | -0.899574 | -1.334843 |
| 27               | 6                | 0              | 4.354612    | -1.801048 | -0.555350 |
| 28               | 6                | 0              | 5.330607    | -1.338555 | 0.329125  |
| 29               | 6                | 0              | 5.575725    | 0.028186  | 0.445838  |
| 30               | 6                | 0              | 4.845259    | 0.933227  | -0.321551 |
| 31               | 6                | 0              | 3.869332    | 0.472215  | -1.206558 |
| 32               | 8                | 0              | 0.367689    | 3.520466  | 0.403791  |
| 33               | 6                | 0              | 1.735337    | 3.575646  | 0.798484  |
| 34               | 8                | 0              | 1.049041    | -1.189643 | 1.247059  |
| 35               | 6                | 0              | 2.048830    | -0.903127 | 2.216008  |
| 36               | 1                | 0              | -0.957089   | 3.613049  | -1.353110 |
| 37               | 1                | 0              | -1.963393   | -1.527305 | -2.565597 |
| 38               | 1                | 0              | -3.392479   | -1.997020 | -1.669277 |
| 39               | 1                | 0              | -3.816428   | 2.705168  | -0.832536 |
| 40               | 1                | 0              | -5.140311   | 2.208907  | 0.203383  |
| 41               | 1                | 0              | -5.198321   | 1.869901  | -1.533974 |
| 42               | 1                | 0              | -4.573250   | -1.406784 | 0.312417  |

|    |   |   |           |           |           |
|----|---|---|-----------|-----------|-----------|
| 43 | 1 | 0 | -5.624318 | -0.672714 | -0.901051 |
| 44 | 1 | 0 | -5.606378 | -0.070448 | 0.764146  |
| 45 | 1 | 0 | -1.727670 | 0.029176  | 2.653052  |
| 46 | 1 | 0 | -0.490798 | -1.051730 | 3.222900  |
| 47 | 1 | 0 | -2.367359 | -2.477346 | 2.855788  |
| 48 | 1 | 0 | -3.240397 | -4.166084 | 1.496207  |
| 49 | 1 | 0 | -3.805667 | -3.549900 | -0.056050 |
| 50 | 1 | 0 | -2.288979 | -4.464893 | 0.039398  |
| 51 | 1 | 0 | 1.362175  | -2.333504 | -0.768139 |
| 52 | 1 | 0 | 0.622902  | -2.264132 | -2.372075 |
| 53 | 1 | 0 | 2.950482  | -2.320496 | -2.764930 |
| 54 | 1 | 0 | 2.458500  | -0.687111 | -3.127251 |
| 55 | 1 | 0 | 4.175045  | -2.870716 | -0.635269 |
| 56 | 1 | 0 | 5.900188  | -2.045640 | 0.926380  |
| 57 | 1 | 0 | 6.336930  | 0.387767  | 1.132987  |
| 58 | 1 | 0 | 5.037442  | 1.999138  | -0.234170 |
| 59 | 1 | 0 | 3.306940  | 1.189769  | -1.801603 |
| 60 | 1 | 0 | 2.304612  | 2.719760  | 0.422851  |
| 61 | 1 | 0 | 2.169575  | 4.482013  | 0.365623  |
| 62 | 1 | 0 | 1.819002  | 3.658447  | 1.885509  |
| 63 | 1 | 0 | 1.635053  | -0.796584 | 3.221177  |
| 64 | 1 | 0 | 2.608984  | -0.008704 | 1.932194  |
| 65 | 1 | 0 | 2.748332  | -1.743481 | 2.231594  |

| Center<br>Number | 2-4<br>Atomic<br>Number | Atomic<br>Type | Standard Orientation<br>(Ångstroms) |           |           |
|------------------|-------------------------|----------------|-------------------------------------|-----------|-----------|
|                  |                         |                | X                                   | Y         | Z         |
| 1                | 6                       | 0              | -0.902695                           | -1.490673 | 0.642674  |
| 2                | 6                       | 0              | -1.009259                           | -0.444915 | -0.505312 |
| 3                | 6                       | 0              | -1.109779                           | 0.954787  | 0.148660  |
| 4                | 6                       | 0              | 0.205243                            | 1.288258  | 0.748044  |
| 5                | 6                       | 0              | 0.792781                            | 0.379480  | 1.546086  |
| 6                | 6                       | 0              | 0.118064                            | -0.972916 | 1.734110  |
| 7                | 8                       | 0              | 0.387629                            | -1.663232 | 2.720811  |
| 8                | 8                       | 0              | 0.779677                            | 2.505515  | 0.453507  |
| 9                | 8                       | 0              | -2.189677                           | 1.112535  | 1.131287  |
| 10               | 6                       | 0              | -2.274480                           | -0.541731 | -1.396319 |
| 11               | 6                       | 0              | -2.512027                           | 0.919741  | -1.872583 |
| 12               | 6                       | 0              | -1.881954                           | 1.859680  | -0.827788 |
| 13               | 6                       | 0              | -2.726632                           | 2.260778  | 0.416099  |
| 14               | 6                       | 0              | -2.323413                           | 3.573140  | 1.092728  |
| 15               | 6                       | 0              | -4.247334                           | 2.173012  | 0.338088  |
| 16               | 6                       | 0              | -2.262117                           | -1.687228 | 1.383480  |
| 17               | 6                       | 0              | -3.464154                           | -1.695382 | 0.484165  |

|    |   |   |           |           |           |
|----|---|---|-----------|-----------|-----------|
| 18 | 6 | 0 | -3.483585 | -1.201826 | -0.764576 |
| 19 | 6 | 0 | -4.708992 | -1.352139 | -1.628501 |
| 20 | 1 | 0 | -2.051808 | -1.153246 | -2.283225 |
| 21 | 1 | 0 | -1.324362 | 2.685463  | -1.281775 |
| 22 | 6 | 0 | 0.204729  | -0.444362 | -1.520963 |
| 23 | 8 | 0 | 0.280362  | 0.445223  | -2.378843 |
| 24 | 6 | 0 | 1.267543  | -1.534416 | -1.503204 |
| 25 | 6 | 0 | 2.525262  | -1.177365 | -2.304106 |
| 26 | 6 | 0 | 3.477026  | -0.297061 | -1.526257 |
| 27 | 6 | 0 | 4.478205  | -0.867487 | -0.727943 |
| 28 | 6 | 0 | 5.353319  | -0.057036 | -0.002478 |
| 29 | 6 | 0 | 5.232176  | 1.329899  | -0.061701 |
| 30 | 6 | 0 | 4.239376  | 1.907283  | -0.850075 |
| 31 | 6 | 0 | 3.366734  | 1.098243  | -1.579367 |
| 32 | 8 | 0 | 1.996912  | 0.734754  | 2.142823  |
| 33 | 6 | 0 | 2.785812  | -0.317751 | 2.683878  |
| 34 | 8 | 0 | -0.603636 | -2.756377 | 0.019504  |
| 35 | 6 | 0 | -0.066091 | -3.783174 | 0.845270  |
| 36 | 1 | 0 | 1.644544  | 2.518624  | 0.912411  |
| 37 | 1 | 0 | -2.010611 | 1.069908  | -2.836268 |
| 38 | 1 | 0 | -3.561165 | 1.161523  | -2.059092 |
| 39 | 1 | 0 | -1.247869 | 3.658846  | 1.252979  |
| 40 | 1 | 0 | -2.801794 | 3.669601  | 2.073781  |
| 41 | 1 | 0 | -2.632114 | 4.428703  | 0.482111  |
| 42 | 1 | 0 | -4.595986 | 1.188615  | 0.024127  |
| 43 | 1 | 0 | -4.641920 | 2.911572  | -0.367729 |
| 44 | 1 | 0 | -4.701907 | 2.366951  | 1.316211  |
| 45 | 1 | 0 | -2.415993 | -0.946908 | 2.175770  |
| 46 | 1 | 0 | -2.266426 | -2.648788 | 1.908443  |
| 47 | 1 | 0 | -4.358707 | -2.155160 | 0.899941  |
| 48 | 1 | 0 | -5.474677 | -1.971884 | -1.149273 |
| 49 | 1 | 0 | -5.163060 | -0.381289 | -1.844102 |
| 50 | 1 | 0 | -4.447127 | -1.833255 | -2.576545 |
| 51 | 1 | 0 | 1.564255  | -1.756362 | -0.476905 |
| 52 | 1 | 0 | 0.815666  | -2.421867 | -1.959242 |
| 53 | 1 | 0 | 3.051395  | -2.105782 | -2.562691 |
| 54 | 1 | 0 | 2.280450  | -0.704801 | -3.262973 |
| 55 | 1 | 0 | 4.587985  | -1.948187 | -0.672266 |
| 56 | 1 | 0 | 6.132516  | -0.508015 | 0.606419  |
| 57 | 1 | 0 | 5.915798  | 1.960854  | 0.500050  |
| 58 | 1 | 0 | 4.146811  | 2.988834  | -0.906419 |
| 59 | 1 | 0 | 2.599807  | 1.566866  | -2.194477 |
| 60 | 1 | 0 | 2.876994  | -1.157671 | 1.987941  |
| 61 | 1 | 0 | 3.789890  | 0.078143  | 2.863651  |

|    |   |   |           |           |          |
|----|---|---|-----------|-----------|----------|
| 62 | 1 | 0 | 2.386030  | -0.640095 | 3.649472 |
| 63 | 1 | 0 | -0.046629 | -4.704826 | 0.256381 |
| 64 | 1 | 0 | -0.668410 | -3.967338 | 1.736729 |
| 65 | 1 | 0 | 0.965731  | -3.549426 | 1.121201 |

| Center<br>Number | 2-5              |                | Standard Orientation<br>(Ångstroms) |           |           |
|------------------|------------------|----------------|-------------------------------------|-----------|-----------|
|                  | Atomic<br>Number | Atomic<br>Type | X                                   | Y         | Z         |
| 1                | 6                | 0              | -0.902695                           | -1.490673 | 0.642674  |
| 2                | 6                | 0              | -1.009259                           | -0.444915 | -0.505312 |
| 3                | 6                | 0              | -1.109779                           | 0.954787  | 0.148660  |
| 4                | 6                | 0              | 0.205243                            | 1.288258  | 0.748044  |
| 5                | 6                | 0              | 0.792781                            | 0.379480  | 1.546086  |
| 6                | 6                | 0              | 0.118064                            | -0.972916 | 1.734110  |
| 7                | 8                | 0              | 0.387629                            | -1.663232 | 2.720811  |
| 8                | 8                | 0              | 0.779677                            | 2.505515  | 0.453507  |
| 9                | 8                | 0              | -2.189677                           | 1.112535  | 1.131287  |
| 10               | 6                | 0              | -2.274480                           | -0.541731 | -1.396319 |
| 11               | 6                | 0              | -2.512027                           | 0.919741  | -1.872583 |
| 12               | 6                | 0              | -1.881954                           | 1.859680  | -0.827788 |
| 13               | 6                | 0              | -2.726632                           | 2.260778  | 0.416099  |
| 14               | 6                | 0              | -2.323413                           | 3.573140  | 1.092728  |
| 15               | 6                | 0              | -4.247334                           | 2.173012  | 0.338088  |
| 16               | 6                | 0              | -2.262117                           | -1.687228 | 1.383480  |
| 17               | 6                | 0              | -3.464154                           | -1.695382 | 0.484165  |
| 18               | 6                | 0              | -3.483585                           | -1.201826 | -0.764576 |
| 19               | 6                | 0              | -4.708992                           | -1.352139 | -1.628501 |
| 20               | 1                | 0              | -2.051808                           | -1.153246 | -2.283225 |
| 21               | 1                | 0              | -1.324362                           | 2.685463  | -1.281775 |
| 22               | 6                | 0              | 0.204729                            | -0.444362 | -1.520963 |
| 23               | 8                | 0              | 0.280362                            | 0.445223  | -2.378843 |
| 24               | 6                | 0              | 1.267543                            | -1.534416 | -1.503204 |
| 25               | 6                | 0              | 2.525262                            | -1.177365 | -2.304106 |
| 26               | 6                | 0              | 3.477026                            | -0.297061 | -1.526257 |
| 27               | 6                | 0              | 4.478205                            | -0.867487 | -0.727943 |
| 28               | 6                | 0              | 5.353319                            | -0.057036 | -0.002478 |
| 29               | 6                | 0              | 5.232176                            | 1.329899  | -0.061701 |
| 30               | 6                | 0              | 4.239376                            | 1.907283  | -0.850075 |
| 31               | 6                | 0              | 3.366734                            | 1.098243  | -1.579367 |
| 32               | 8                | 0              | 1.996912                            | 0.734754  | 2.142823  |
| 33               | 6                | 0              | 2.785812                            | -0.317751 | 2.683878  |
| 34               | 8                | 0              | -0.603636                           | -2.756377 | 0.019504  |
| 35               | 6                | 0              | -0.066091                           | -3.783174 | 0.845270  |
| 36               | 1                | 0              | 1.644544                            | 2.518624  | 0.912411  |



|    |   |   |           |           |           |
|----|---|---|-----------|-----------|-----------|
| 37 | 1 | 0 | -2.010611 | 1.069908  | -2.836268 |
| 38 | 1 | 0 | -3.561165 | 1.161523  | -2.059092 |
| 39 | 1 | 0 | -1.247869 | 3.658846  | 1.252979  |
| 40 | 1 | 0 | -2.801794 | 3.669601  | 2.073781  |
| 41 | 1 | 0 | -2.632114 | 4.428703  | 0.482111  |
| 42 | 1 | 0 | -4.595986 | 1.188615  | 0.024127  |
| 43 | 1 | 0 | -4.641920 | 2.911572  | -0.367729 |
| 44 | 1 | 0 | -4.701907 | 2.366951  | 1.316211  |
| 45 | 1 | 0 | -2.415993 | -0.946908 | 2.175770  |
| 46 | 1 | 0 | -2.266426 | -2.648788 | 1.908443  |
| 47 | 1 | 0 | -4.358707 | -2.155160 | 0.899941  |
| 48 | 1 | 0 | -5.474677 | -1.971884 | -1.149273 |
| 49 | 1 | 0 | -5.163060 | -0.381289 | -1.844102 |
| 50 | 1 | 0 | -4.447127 | -1.833255 | -2.576545 |
| 51 | 1 | 0 | 1.564255  | -1.756362 | -0.476905 |
| 52 | 1 | 0 | 0.815666  | -2.421867 | -1.959242 |
| 53 | 1 | 0 | 3.051395  | -2.105782 | -2.562691 |
| 54 | 1 | 0 | 2.280450  | -0.704801 | -3.262973 |
| 55 | 1 | 0 | 4.587985  | -1.948187 | -0.672266 |
| 56 | 1 | 0 | 6.132516  | -0.508015 | 0.606419  |
| 57 | 1 | 0 | 5.915798  | 1.960854  | 0.500050  |
| 58 | 1 | 0 | 4.146811  | 2.988834  | -0.906419 |
| 59 | 1 | 0 | 2.599807  | 1.566866  | -2.194477 |
| 60 | 1 | 0 | 2.876994  | -1.157671 | 1.987941  |
| 61 | 1 | 0 | 3.789890  | 0.078143  | 2.863651  |
| 62 | 1 | 0 | 2.386030  | -0.640095 | 3.649472  |
| 63 | 1 | 0 | -0.046629 | -4.704826 | 0.256381  |
| 64 | 1 | 0 | -0.668410 | -3.967338 | 1.736729  |
| 65 | 1 | 0 | 0.965731  | -3.549426 | 1.121201  |

---

**Table S5.** The NO product inhibitory effects of compounds **1** and **2** in RAW 264.7 macrophages.

| Compd.               | Cell viability <sup>a)</sup> % | NO Production inhibitory effect <sup>b)</sup><br>(IC <sub>50</sub> μM) |
|----------------------|--------------------------------|------------------------------------------------------------------------|
| <b>1</b>             | 0.94                           | 13.2 ± 0.78                                                            |
| <b>2</b>             | 0.98                           | 9.8 ± 0.63                                                             |
| L-NMMA <sup>c)</sup> | ---                            | 26.8 ± 1.98                                                            |

<sup>a)</sup> the cell viability at the concentration of 30 μM; <sup>b)</sup> the NO Production inhibitory effect of compounds **1** and **2** at the concentrations from 1.875 to 30 μM; <sup>c)</sup> the positive control group.

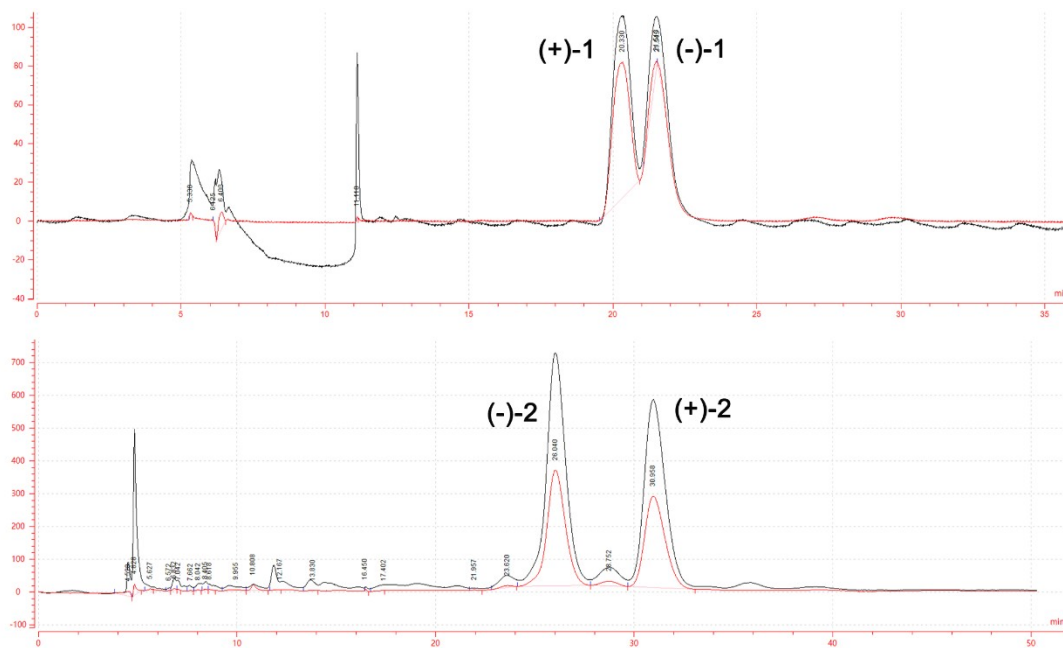

**Figure S1.** The chiral HPLC resolution of **1** and **2** led to the separation of two pairs of enantiomers (-)-**1** and (+)-**1**, and (-)-**2** and (+)-**2**, respectively. The spectra were obtained by Pre-HPLC with a LC-120 system (Separation, Beijing, China), equipped with a Chiralpak® IC column (10 mm × 250 mm i.d., 5 μm, Daicel, Tokyo, Japan) with flow rate at 3.0 ml/min (v/v: n-hexane: isopropanol = 90:10, **1**; cyclohexane: isopropanol = 80:20, **2**), detected by a binary channel UV detector at 210 and 300 nm.

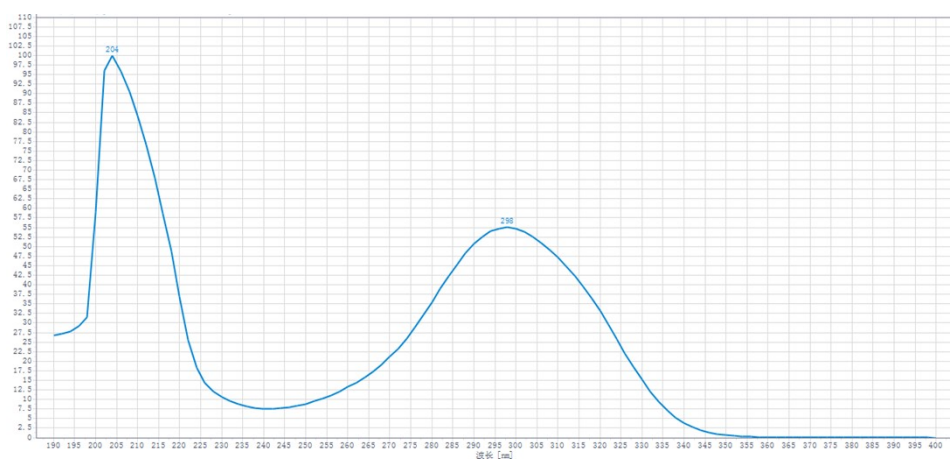

**Figure S1-1** UV spectrum of compound **1**

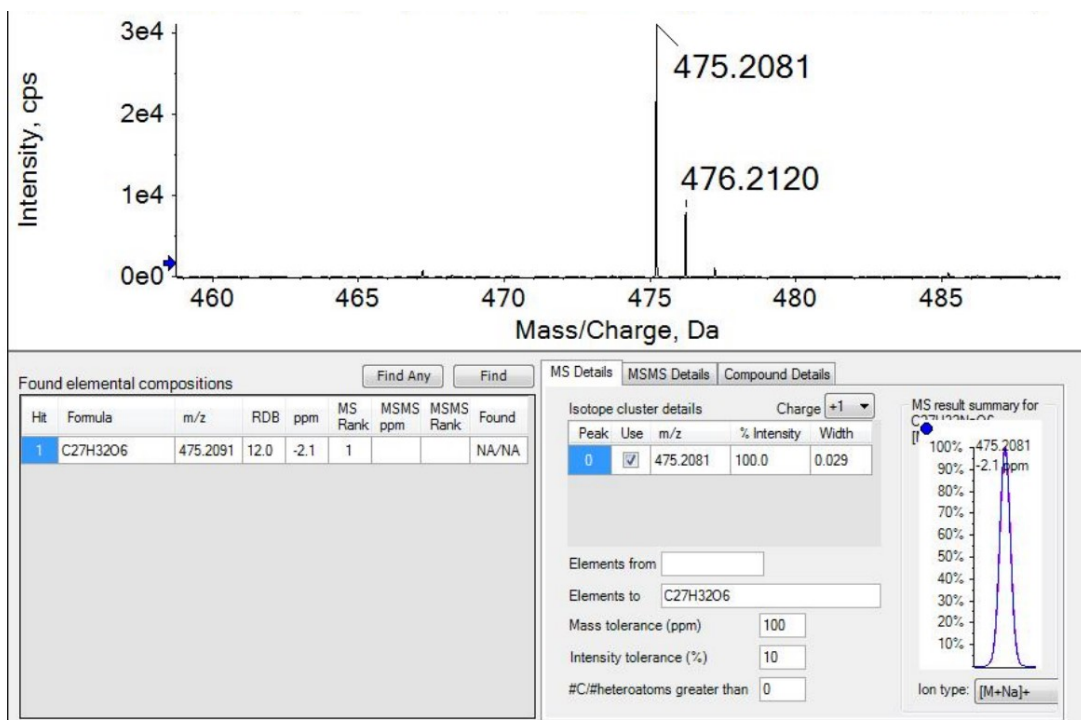

Figure S1-2 HRESIMS of compound 1

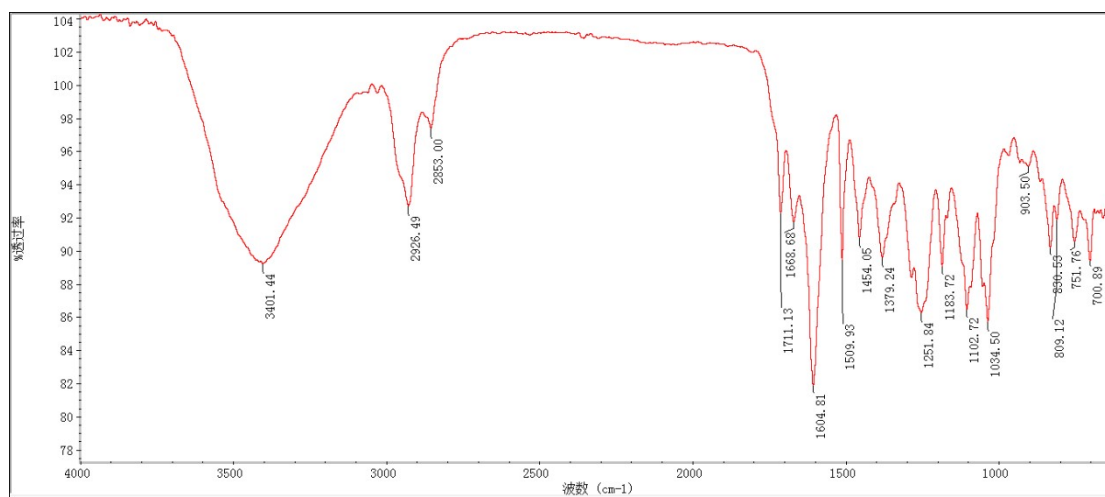

Figure S1-3 IR spectrum of compound 1 (MeOH)

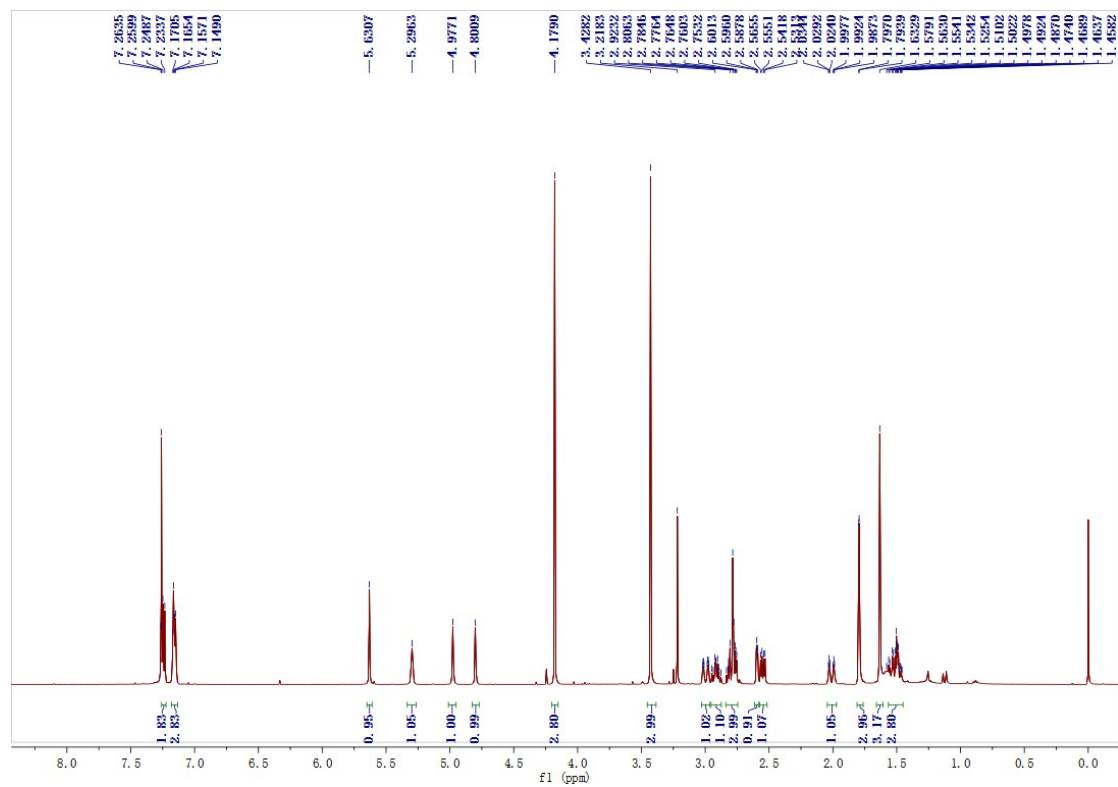

Figure S1-4 <sup>1</sup>H NMR spectrum of compound **1** (CDCl<sub>3</sub>, 500 MHz)

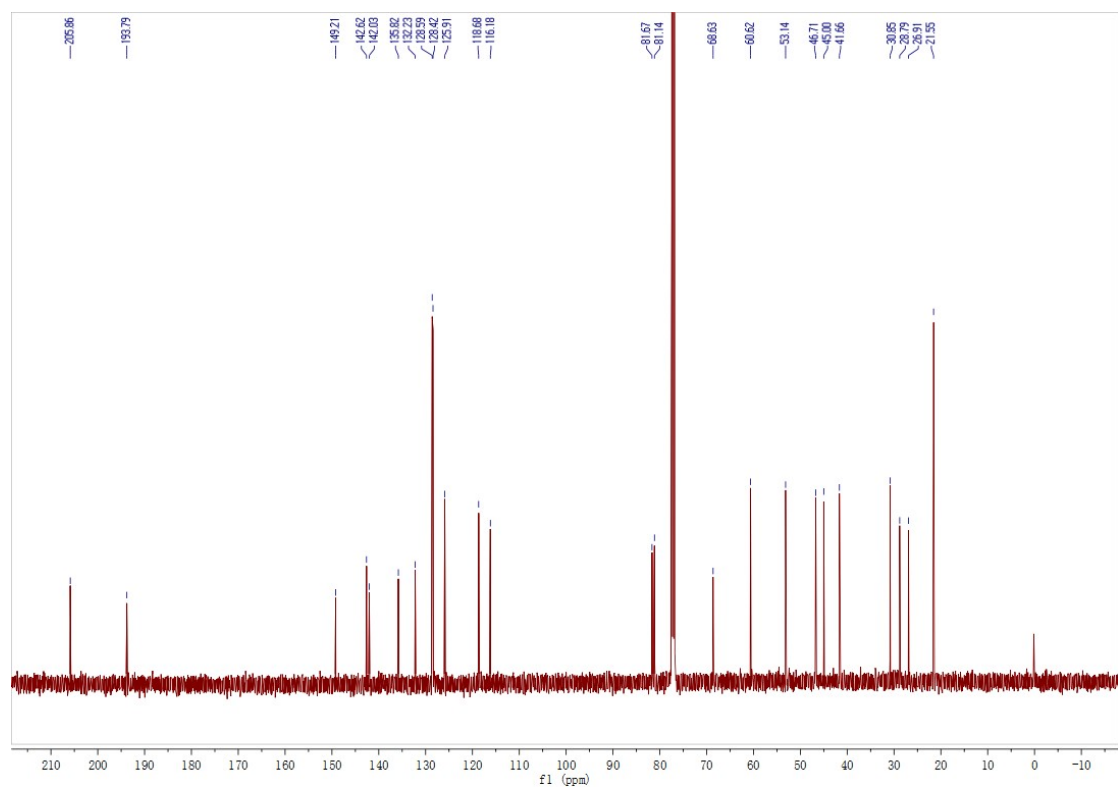

Figure S1-5 <sup>13</sup>C NMR spectrum of compound **1** (CDCl<sub>3</sub>, 125 MHz)

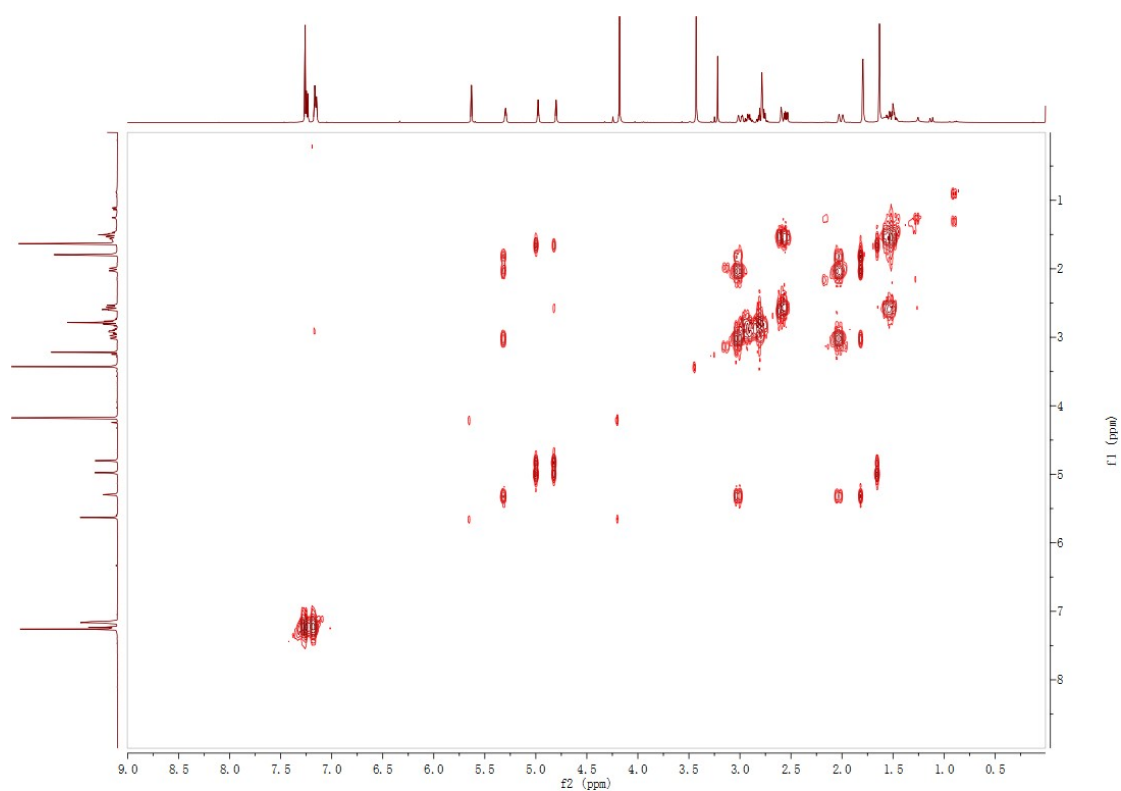

Figure S1-6  $^1\text{H}$ - $^1\text{H}$  COSY spectrum of compound **1** ( $\text{CDCl}_3$ , 500 MHz)

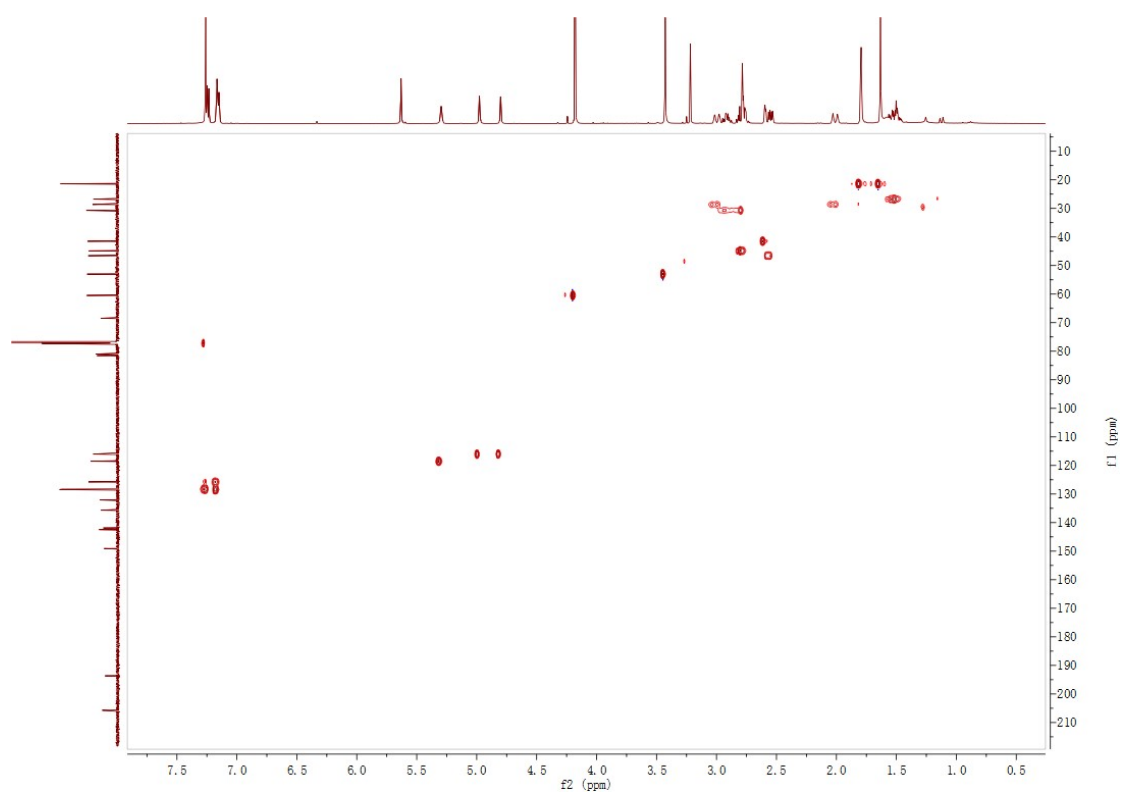

Figure S1-7 HSQC spectrum of compound **1** ( $\text{CDCl}_3$ , 500 MHz)

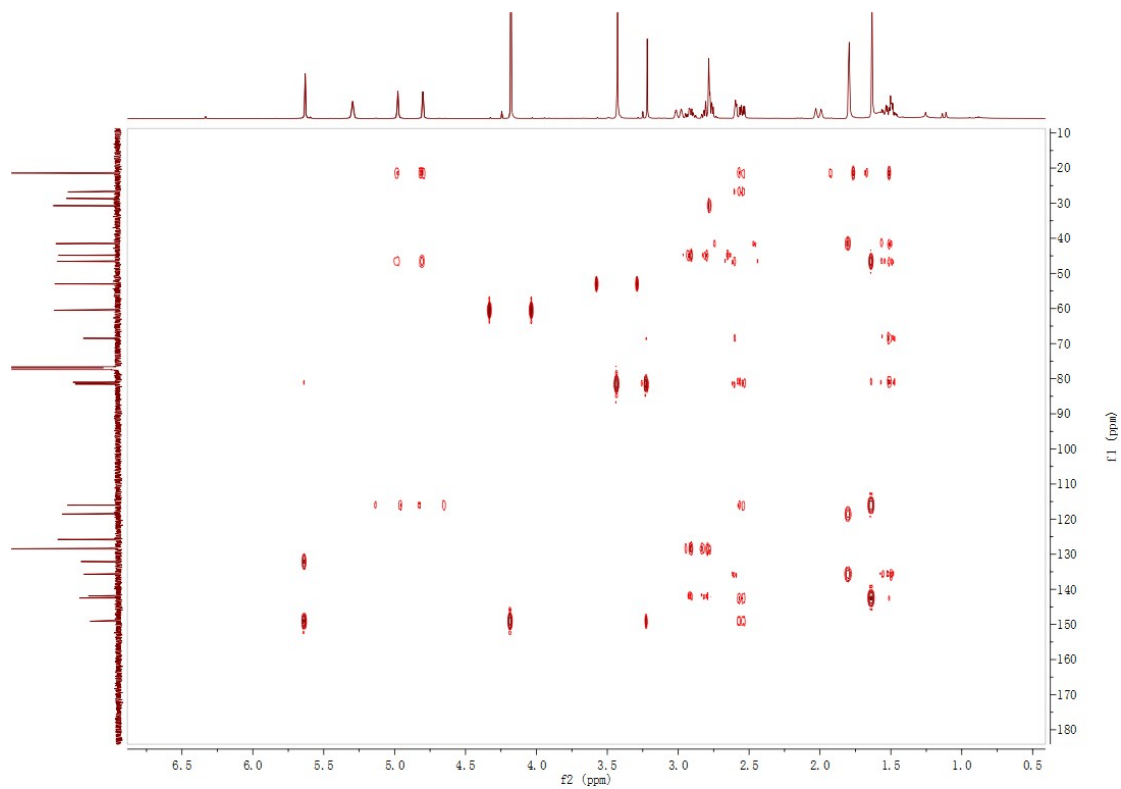

Figure S1-8 HMBC spectrum of compound **1** (CDCl<sub>3</sub>, 500 MHz)

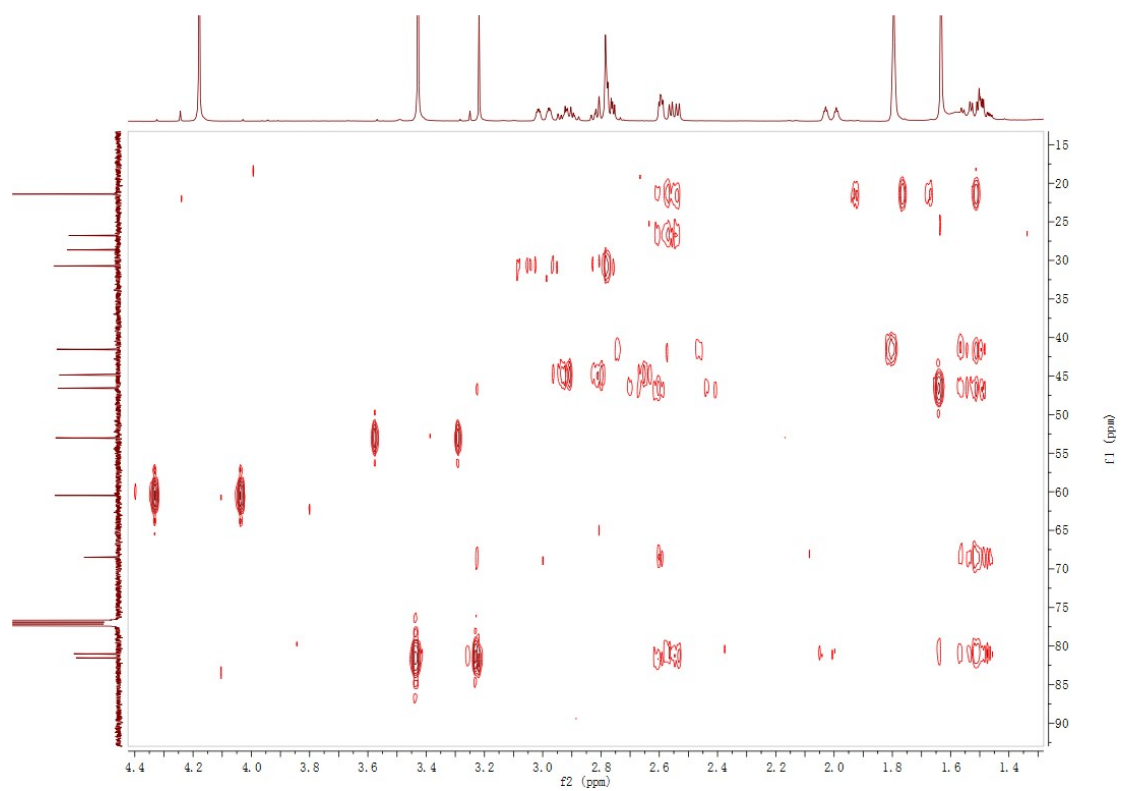

Figure S1-8-1 The expansion HMBC spectrum of compound **1** (CDCl<sub>3</sub>, 500 MHz)

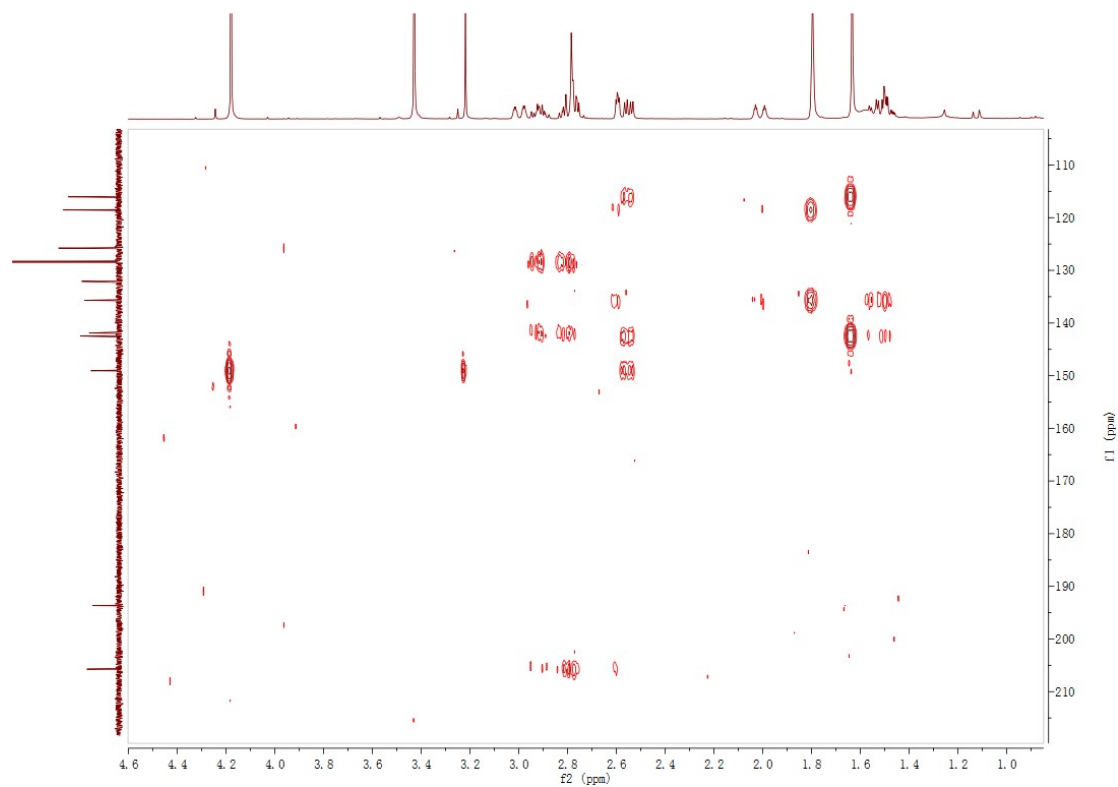

Figure S1-8-3 The expansion HMBC spectrum of compound **1** (CDCl<sub>3</sub>, 500 MHz)

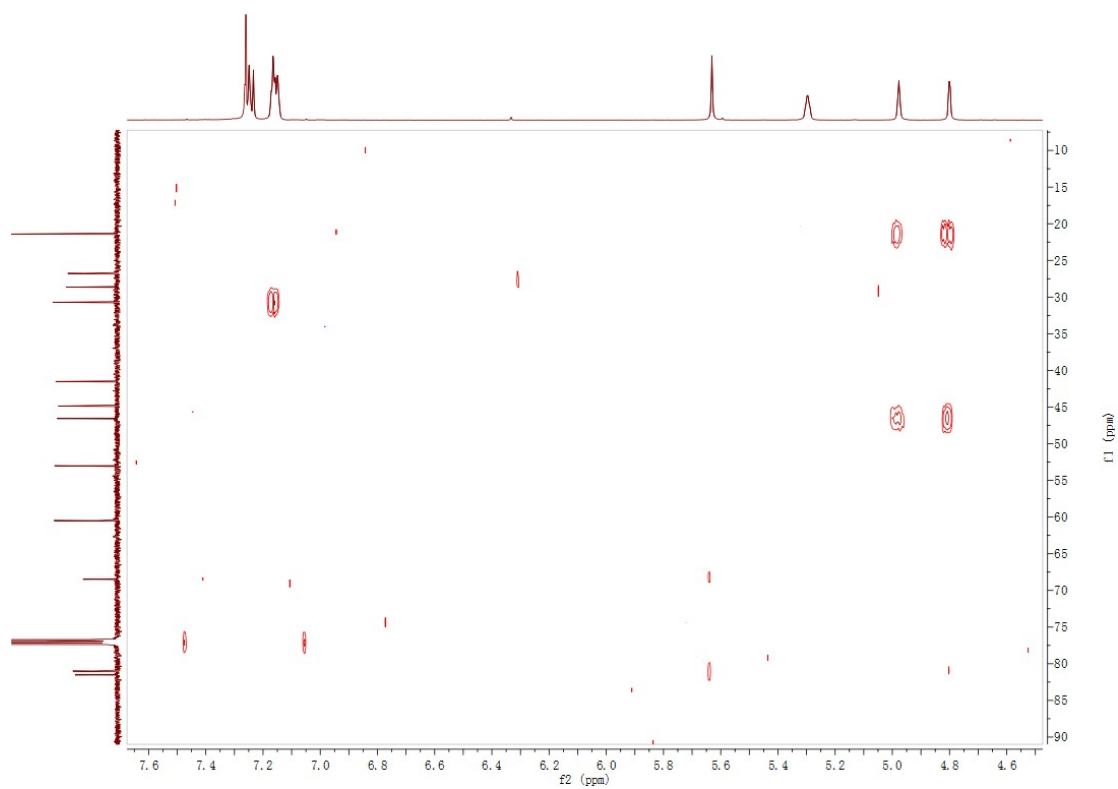

Figure S1-8-3 The expansion HMBC spectrum of compound **1** (CDCl<sub>3</sub>, 500 MHz)



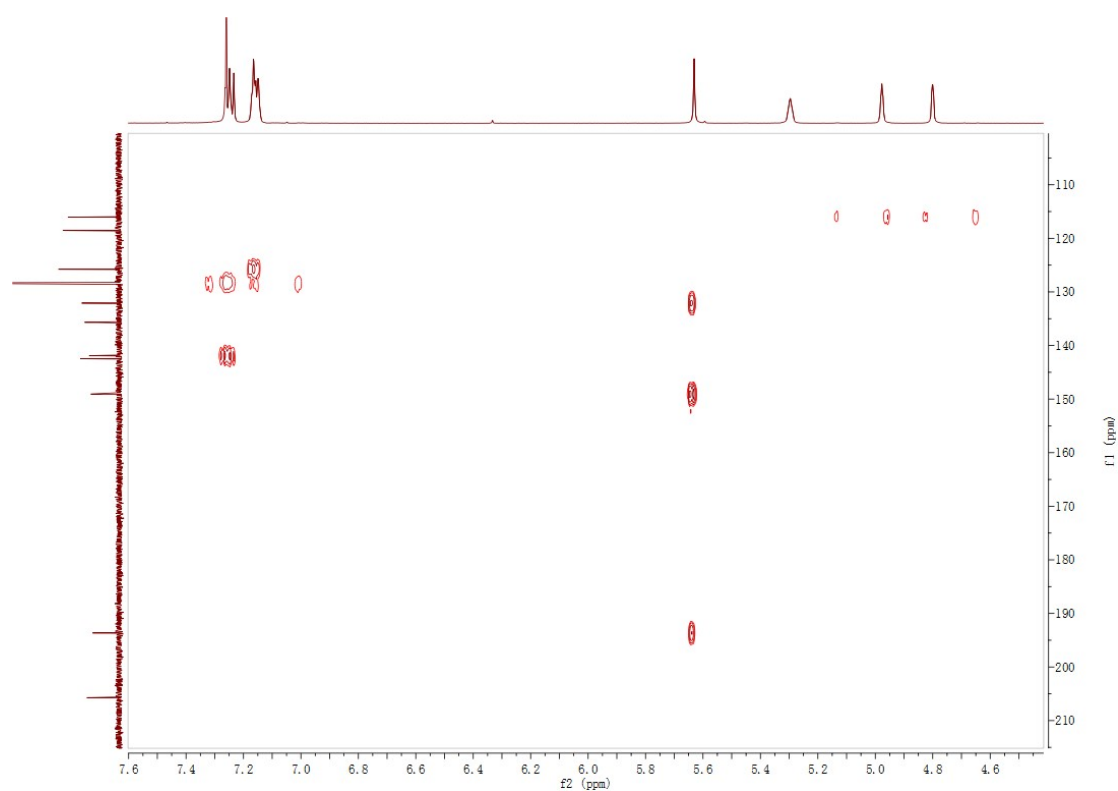

Figure S1-8-4 The expansion HMBC spectrum of compound **1** (CDCl<sub>3</sub>, 500 MHz)

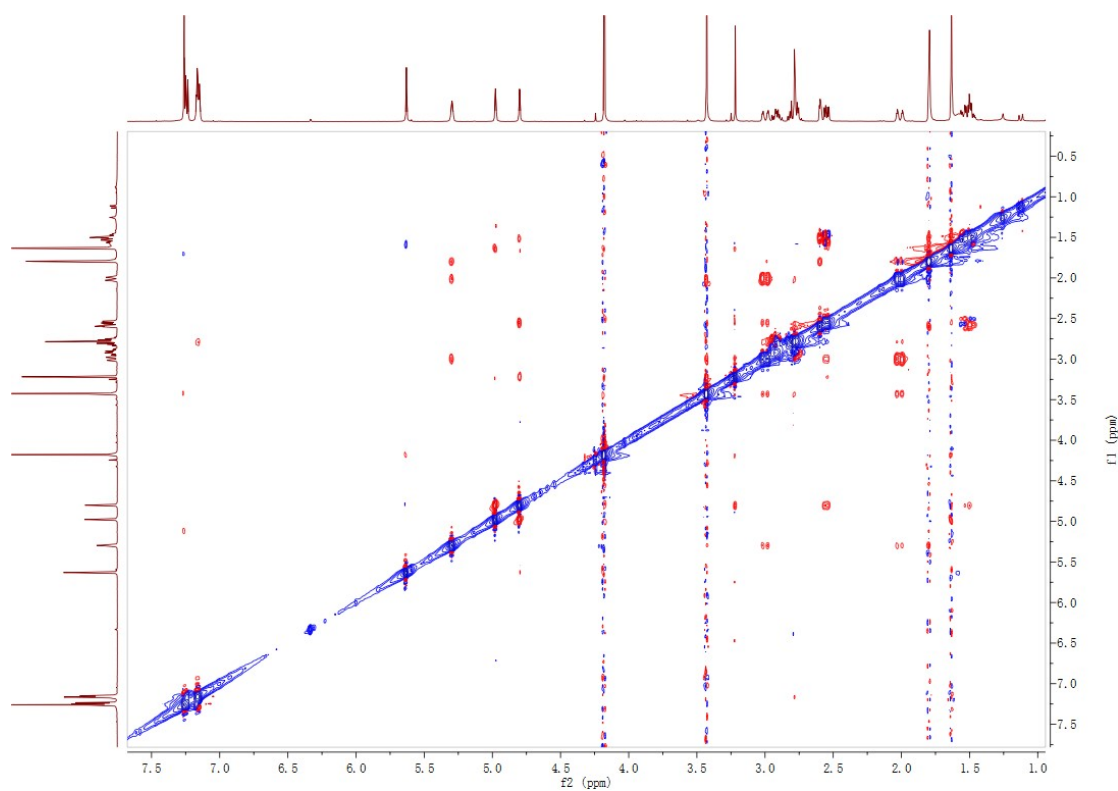

Figure S1-9 ROESY spectrum of compound **1** (CDCl<sub>3</sub>, 500 MHz)

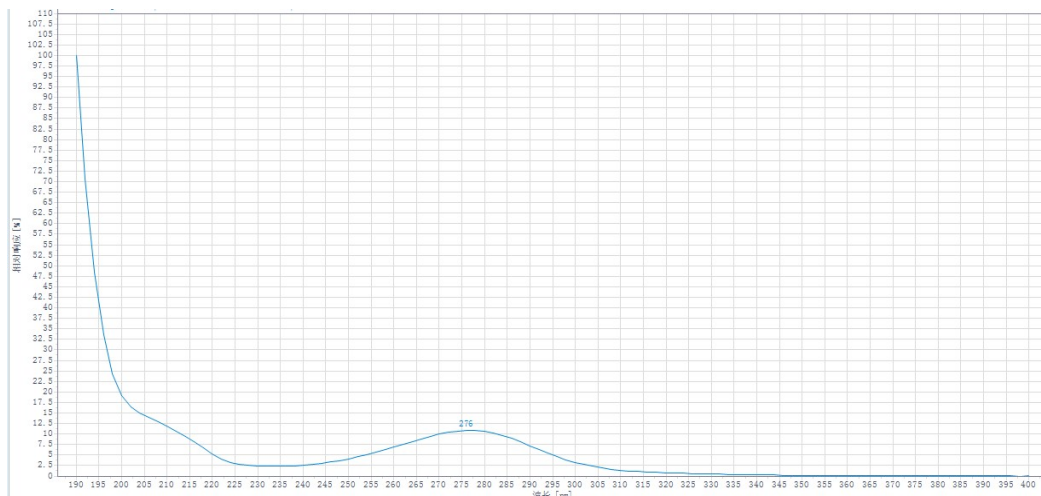

Figure S2-1 UV spectrum of compound 2

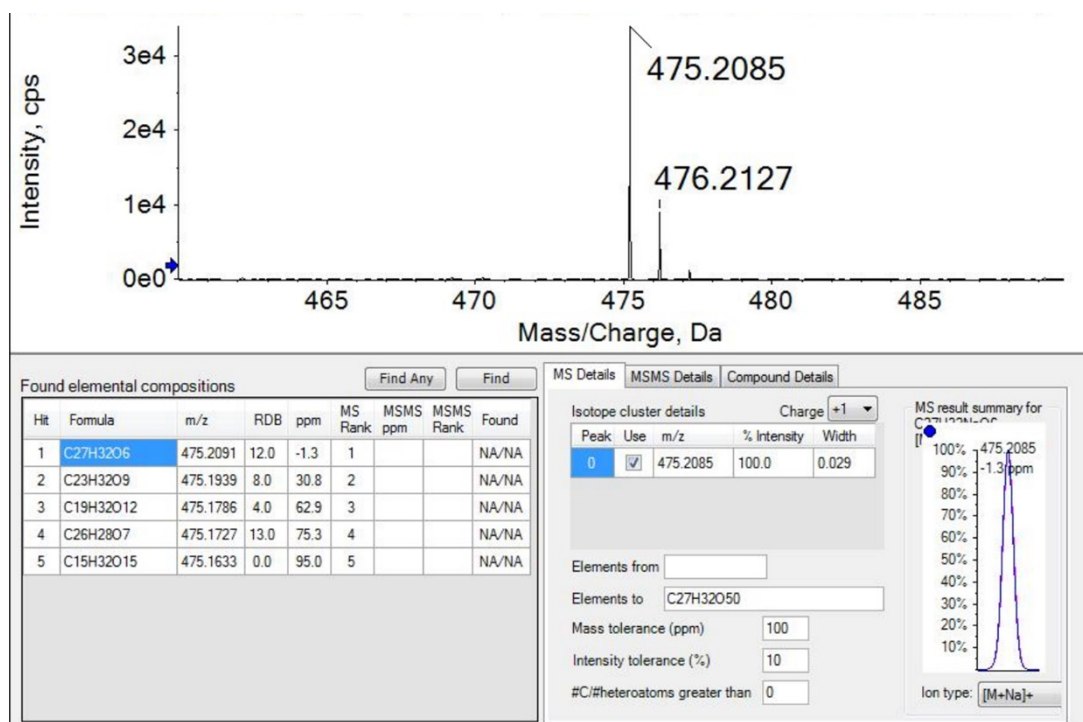

Figure S2-2 HRESIMS of compound 2

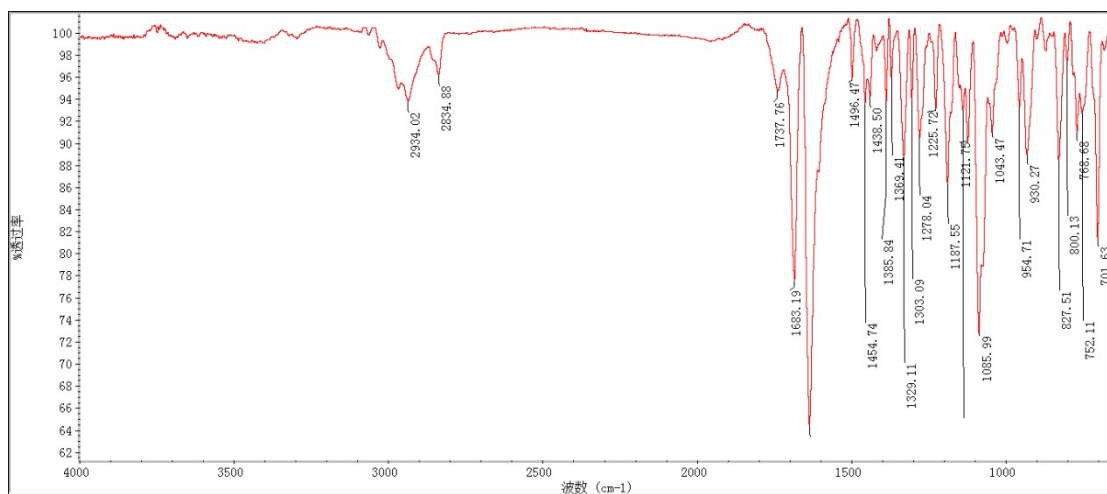

Figure S2-3 IR spectrum of compound 2 (MeOH)

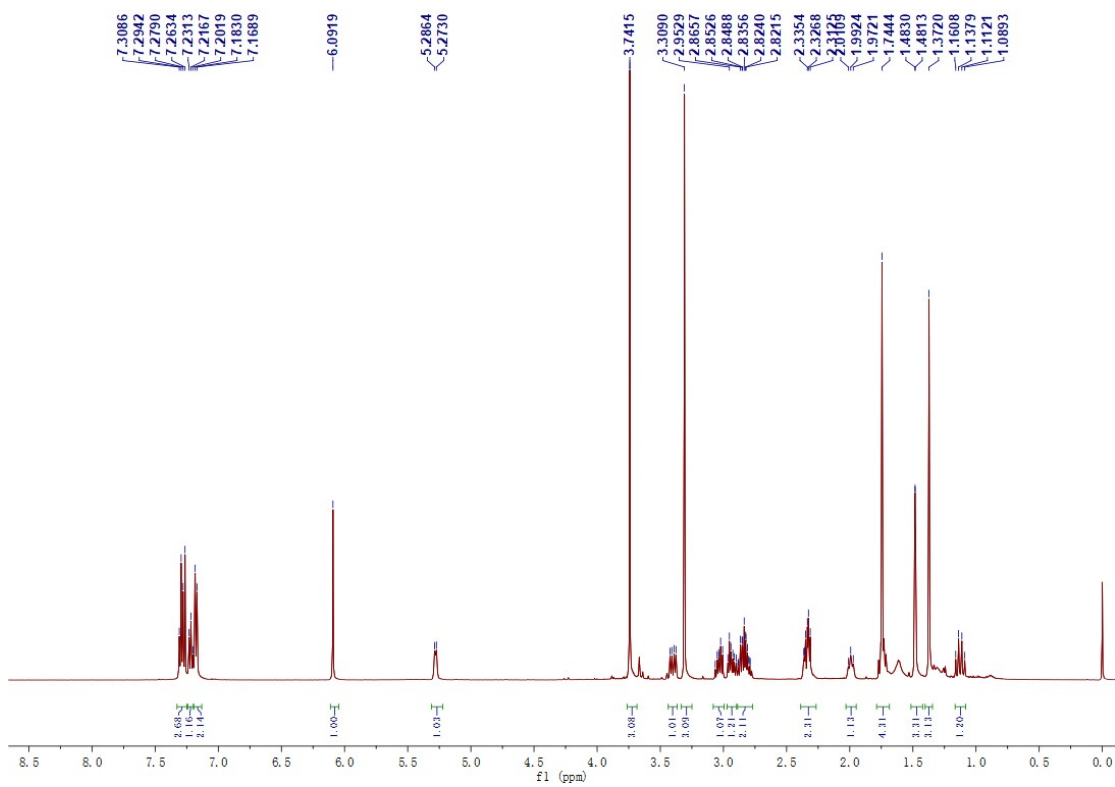

Figure S2-4 <sup>1</sup>H NMR spectrum of compound 2 (CDCl<sub>3</sub>, 500 MHz)

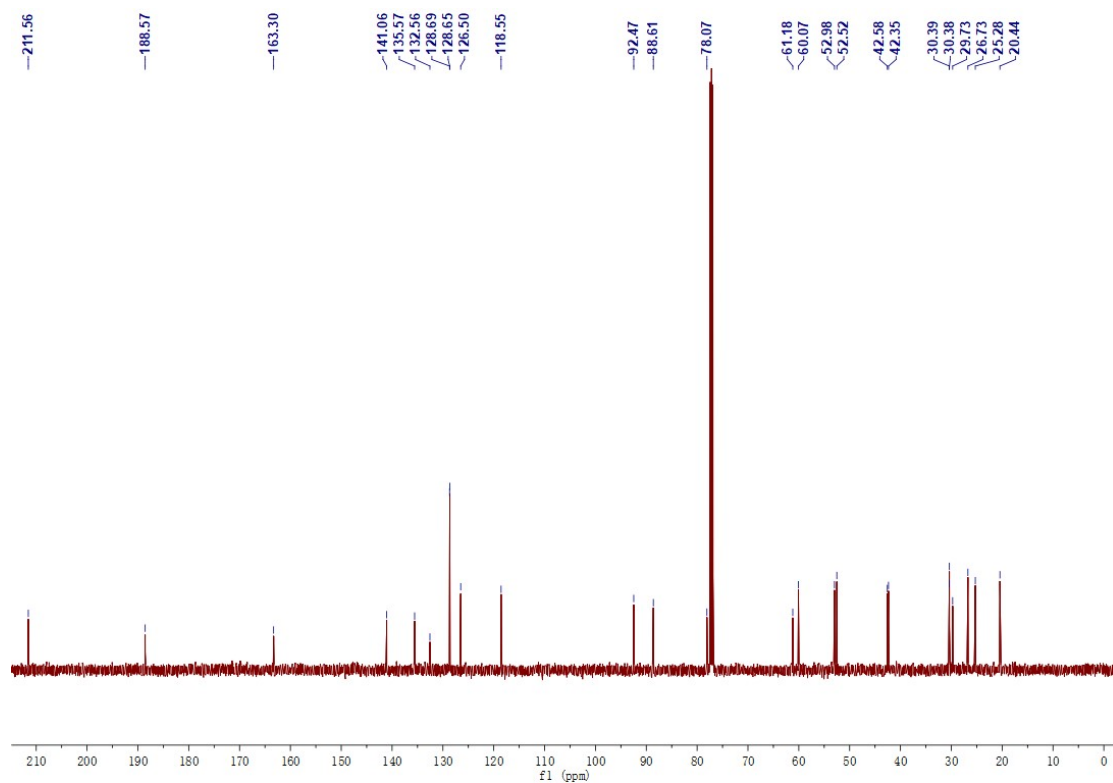

Figure S2-5  $^{13}\text{C}$  NMR spectrum of compound **2** ( $\text{CDCl}_3$ , 125 MHz)

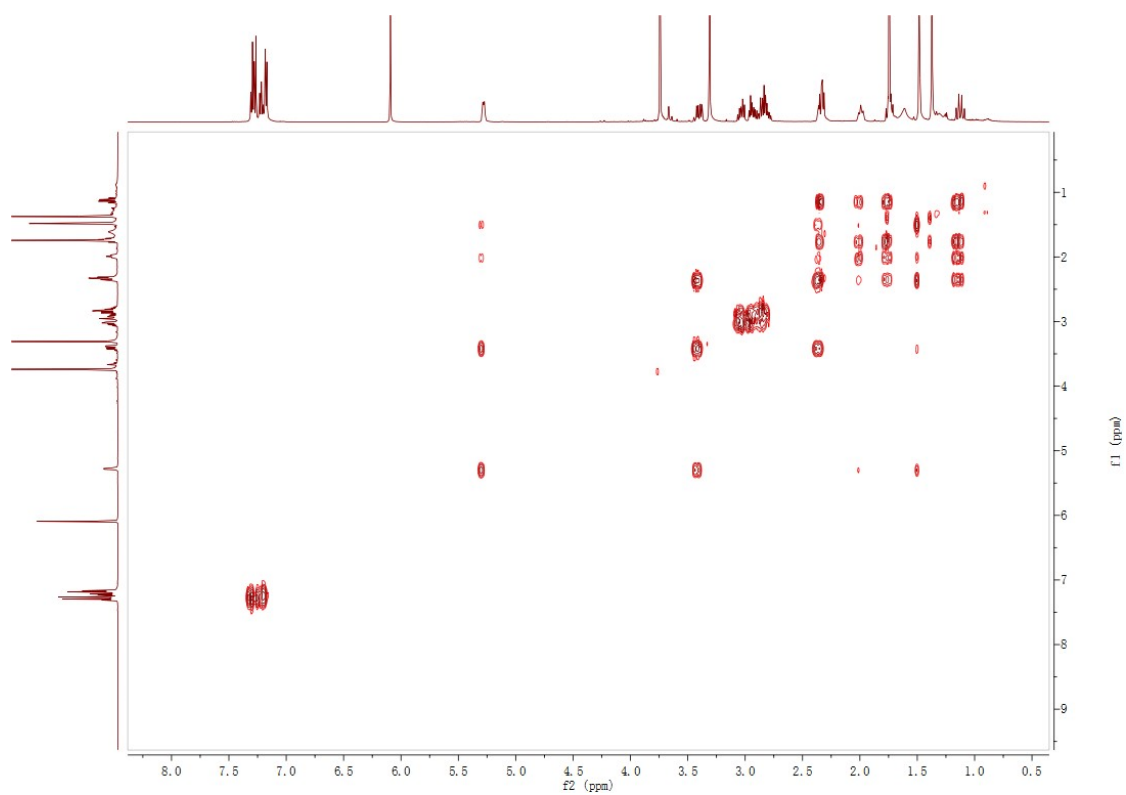

Figure S2-6  $^1\text{H}$ - $^1\text{H}$  COSY spectrum of compound **2** ( $\text{CDCl}_3$ , 500 MHz)

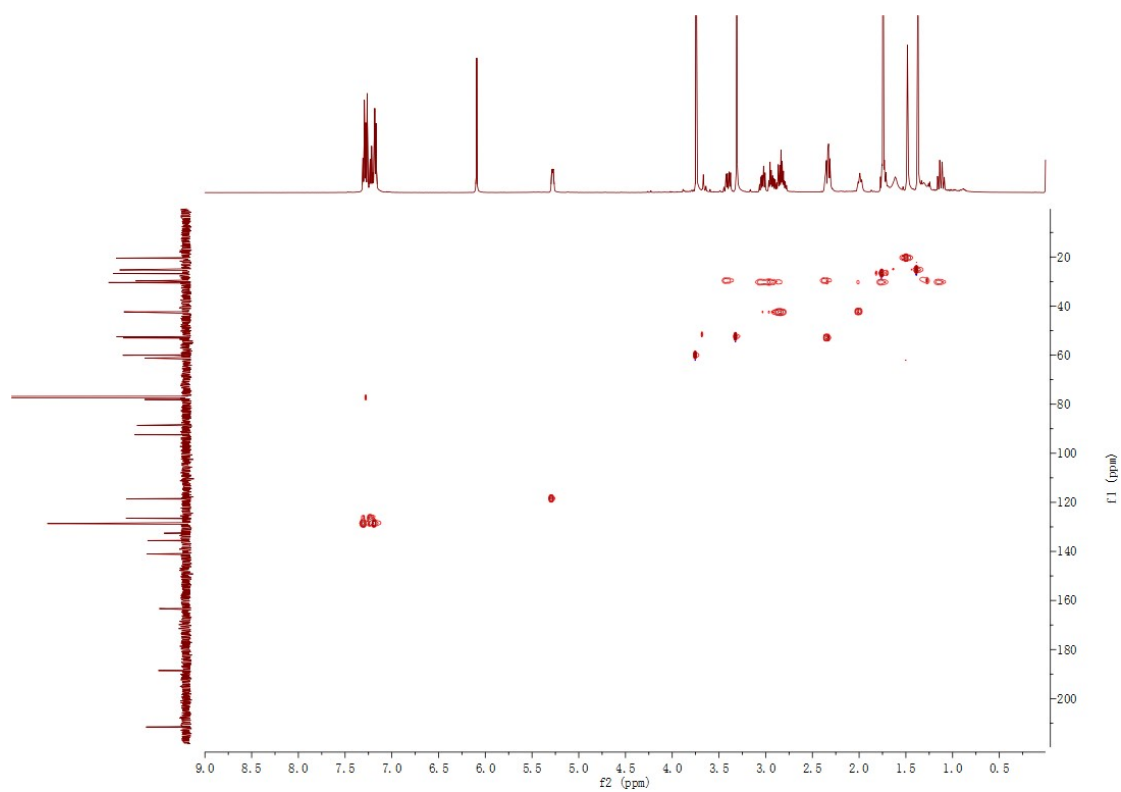

Figure S2-7 HSQC spectrum of compound **2** (CDCl<sub>3</sub>, 500 MHz)

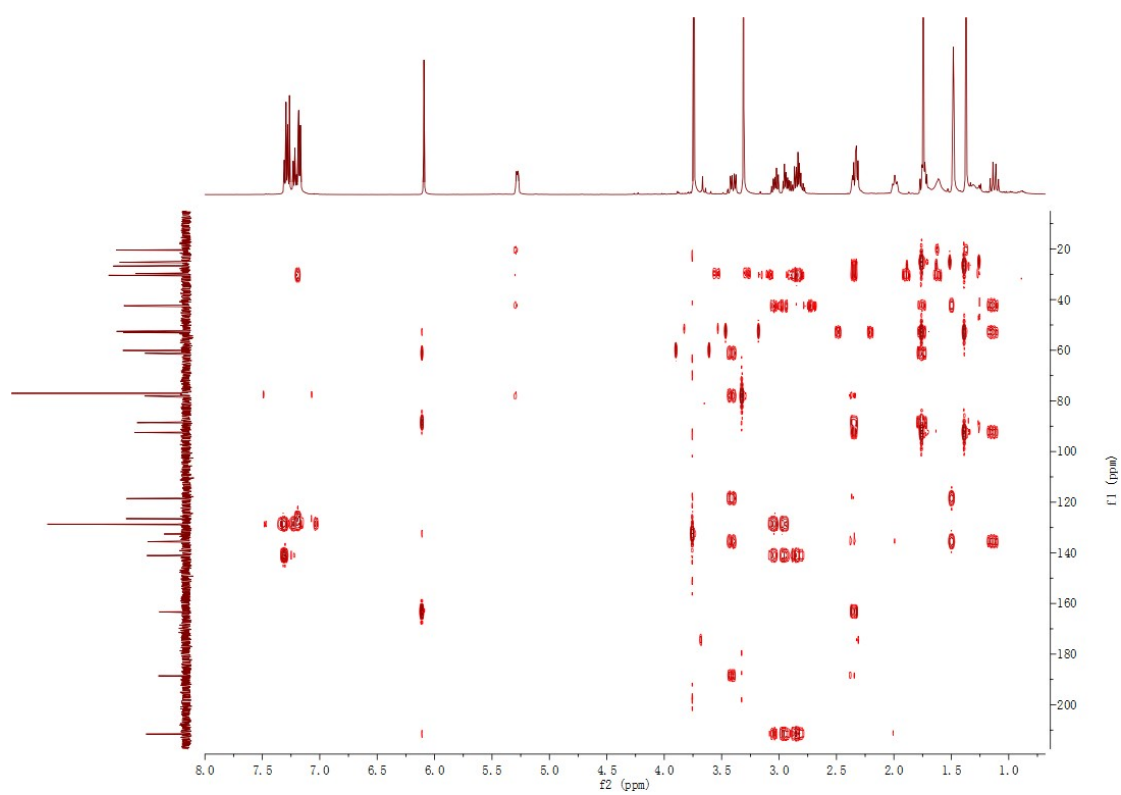

Figure S2-8 HMBC spectrum of compound **2** (CDCl<sub>3</sub>, 500 MHz)

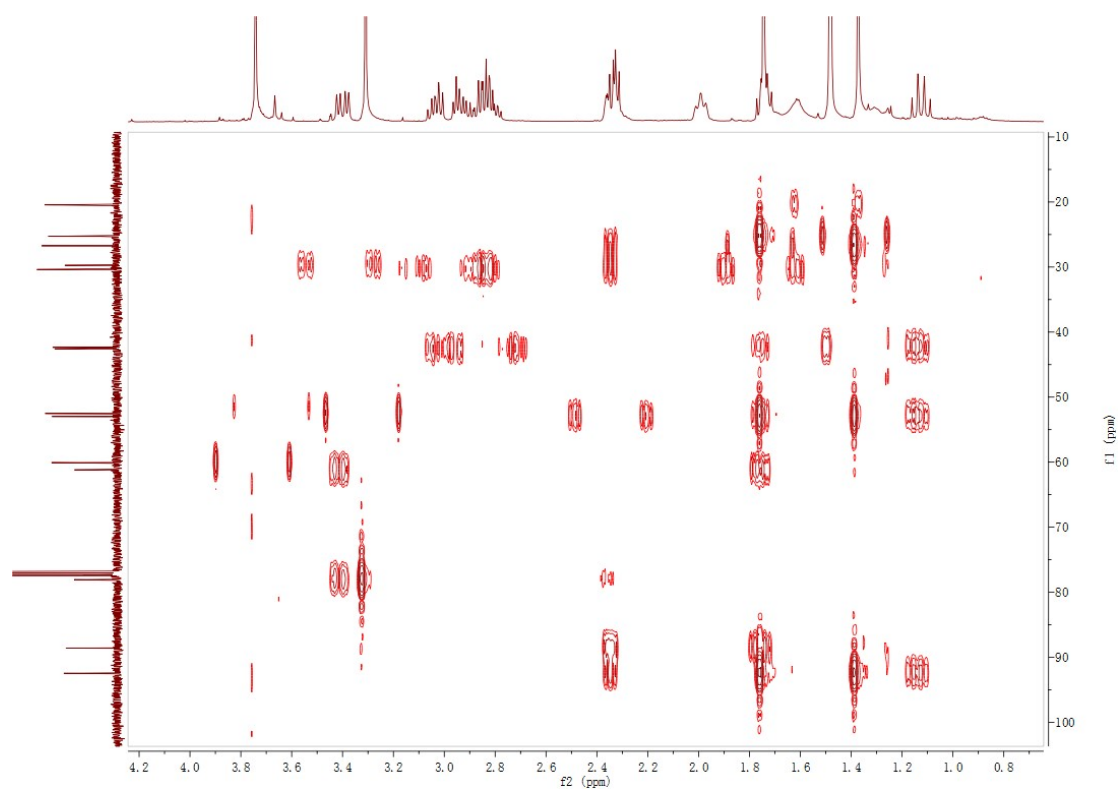

Figure S2-8-1 The expansion HMBC spectrum of compound **2** (CDCl<sub>3</sub>, 500 MHz)

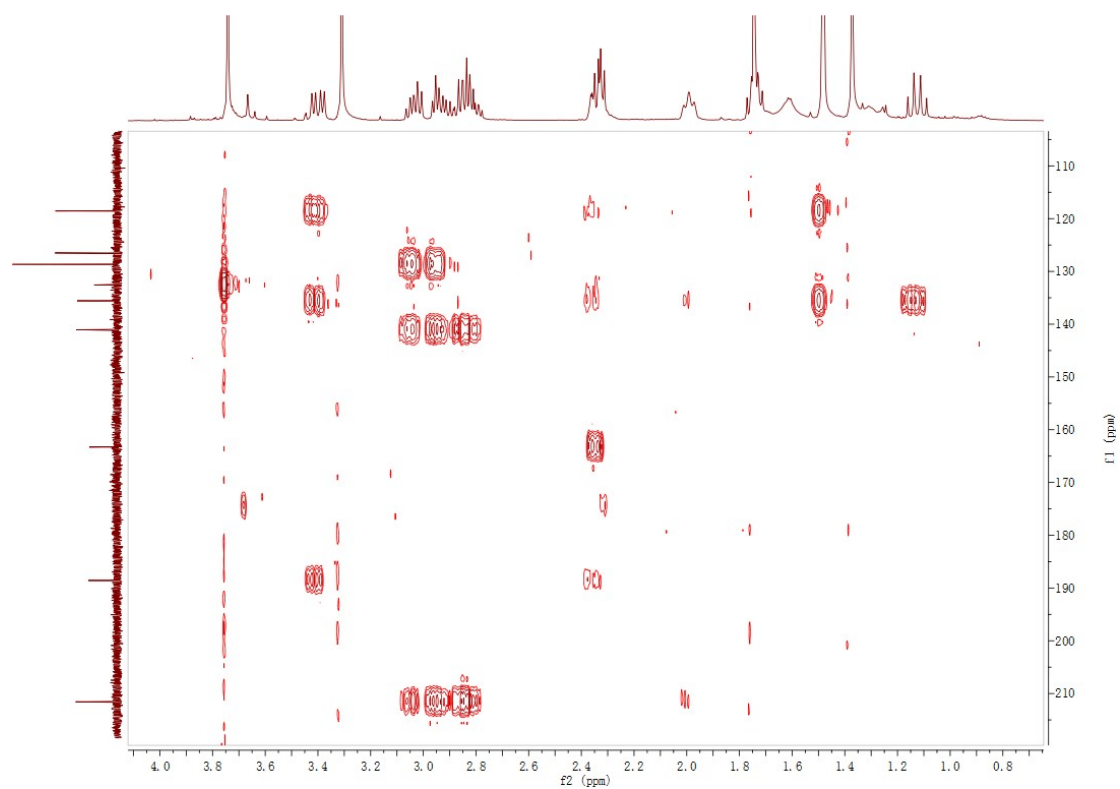

Figure S2-8-2 The expansion HMBC spectrum of compound **2** (CDCl<sub>3</sub>, 500 MHz)

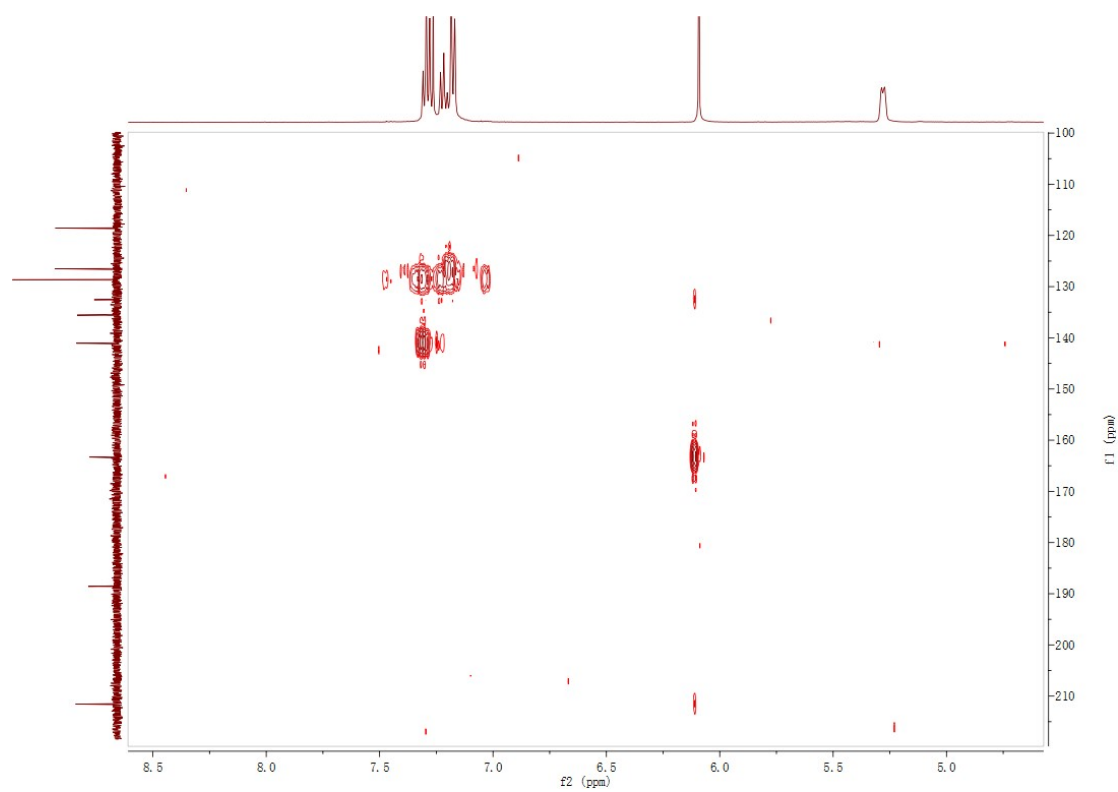

Figure S2-8-3 The expansion HMBC spectrum of compound **2** (CDCl<sub>3</sub>, 500 MHz)

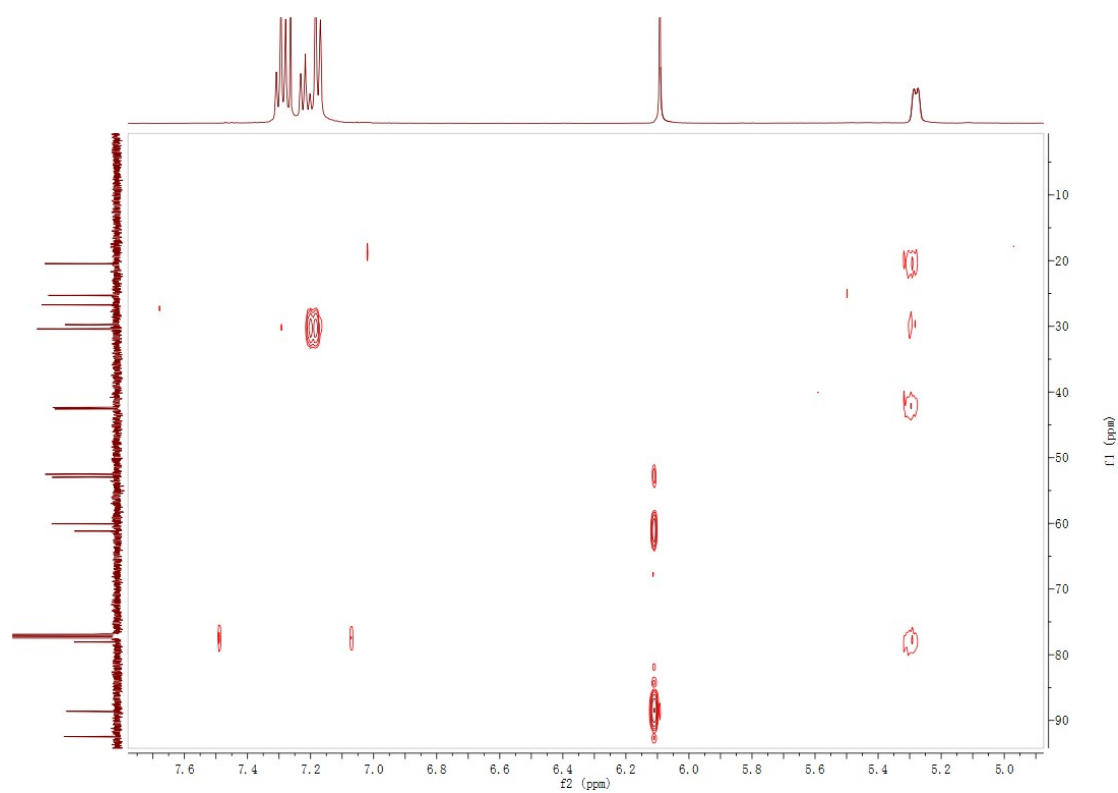

Figure S2-8-4 The expansion HMBC spectrum of compound **2** (CDCl<sub>3</sub>, 500 MHz)

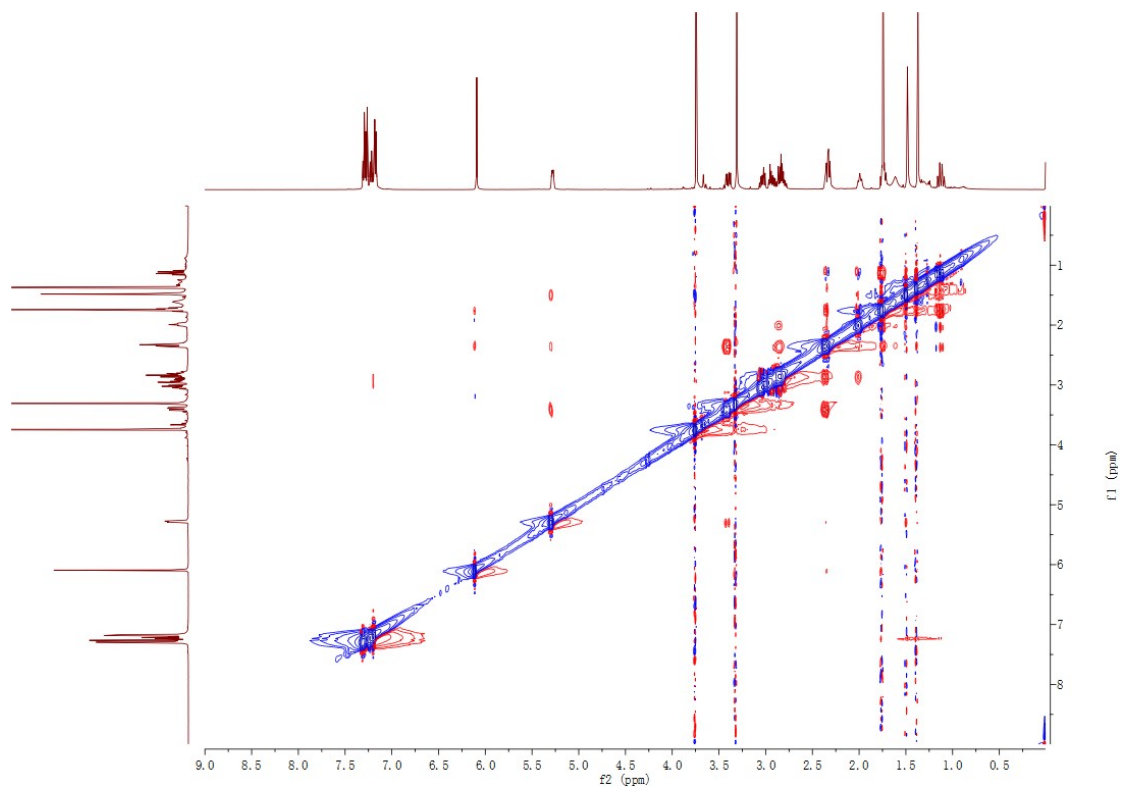

Figure S2-9 ROESY spectrum of compound **2** (CDCl<sub>3</sub>, 500 MHz)

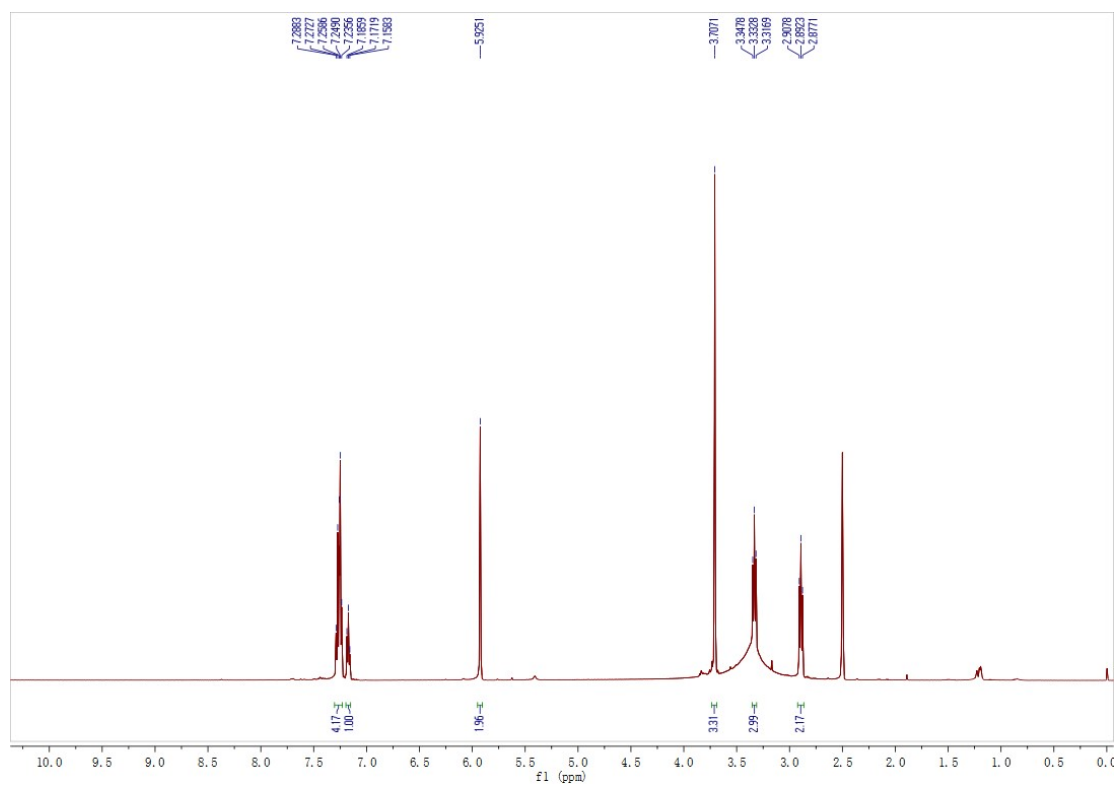

Figure S3-1 <sup>1</sup>H NMR spectrum of compound **3** (CDCl<sub>3</sub>, 500 MHz)



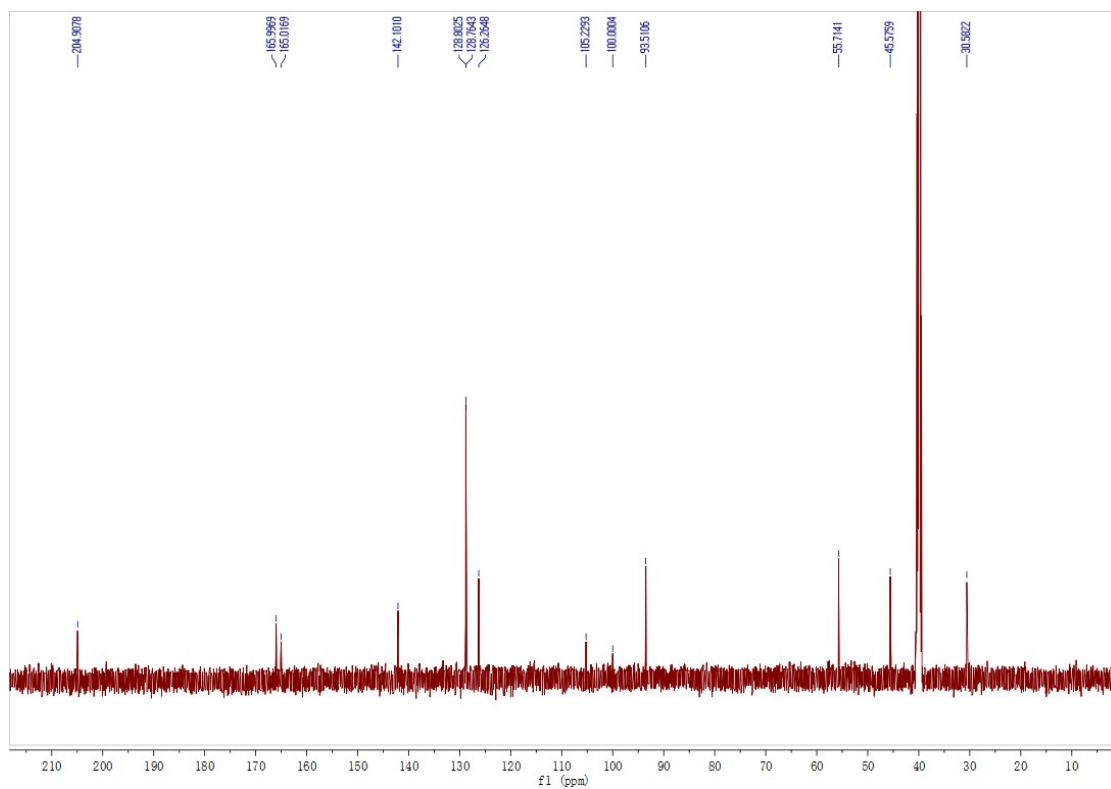

Figure S3-2  $^{13}\text{C}$  NMR spectrum of compound **3** ( $\text{CDCl}_3$ , 125 MHz)
